# Supplementary material
Source: PubMed Central journal article supplement (PMC8465780)

Supplemental Figure 1

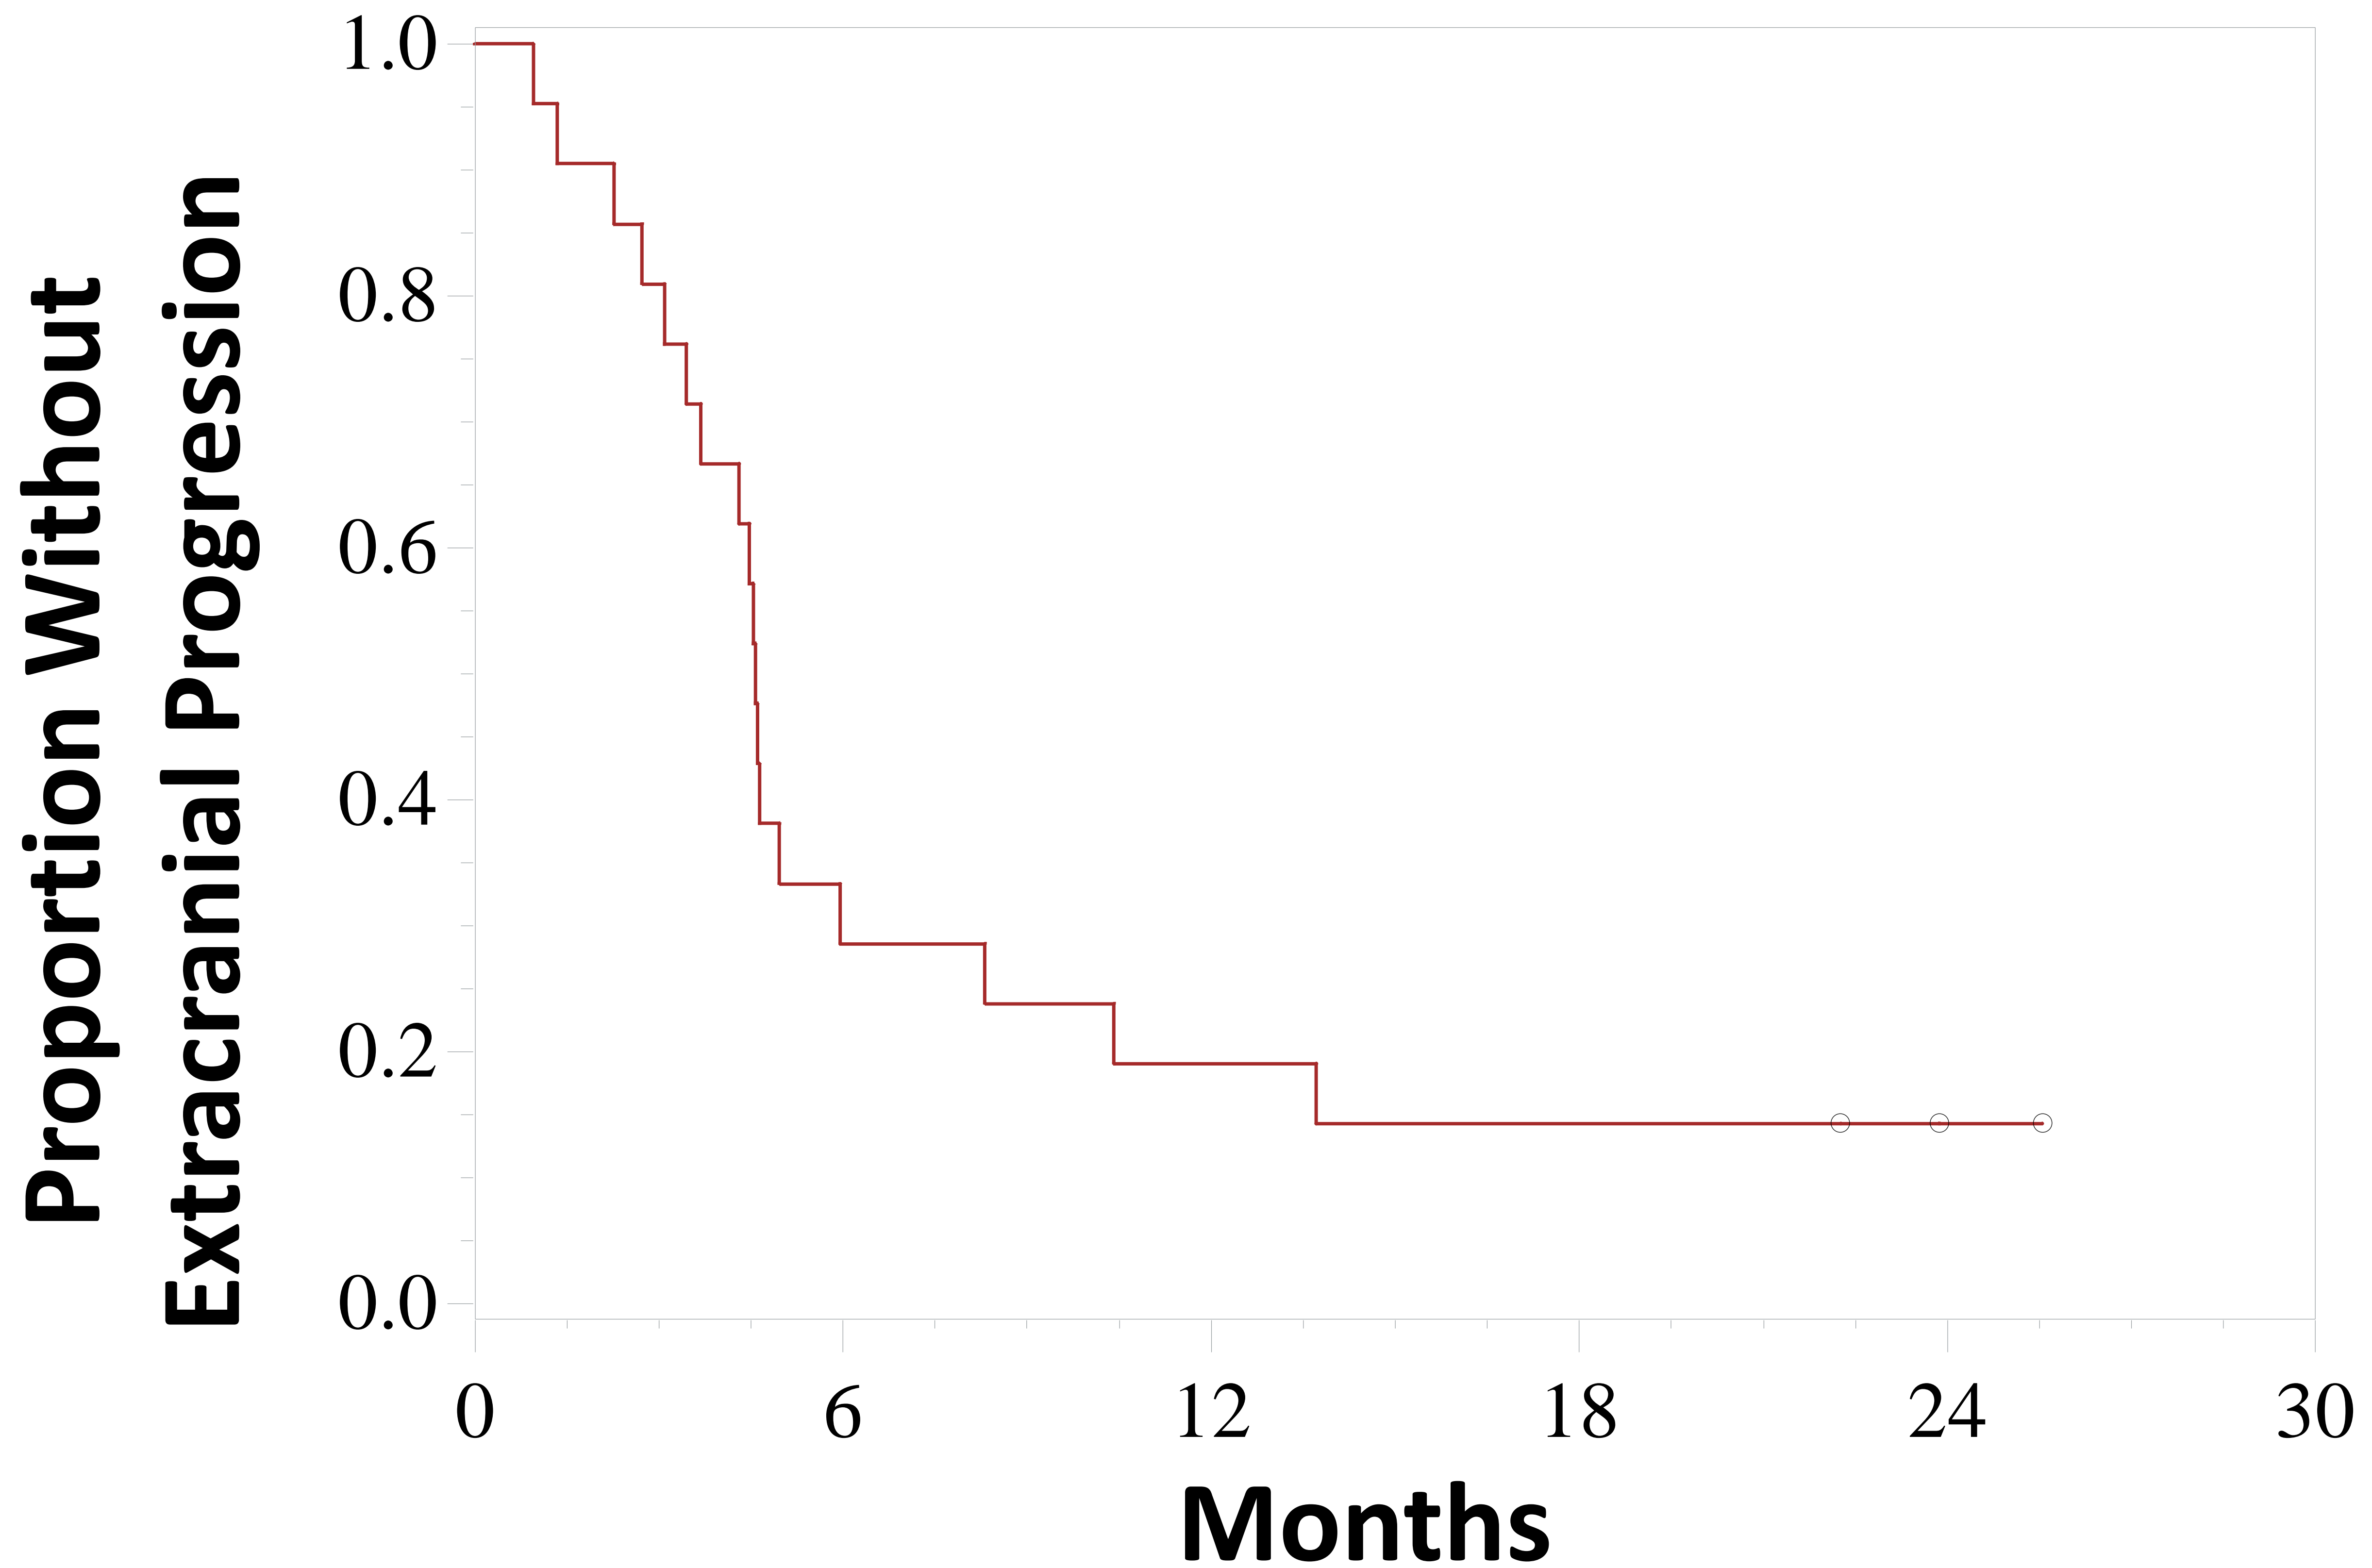

|           |                 |                 |                            |                          |
|-----------|-----------------|-----------------|----------------------------|--------------------------|
| <b>N</b>  | <b>Event</b>    | <b>Censored</b> | <b>Median PFS (95% CI)</b> | <b>0.5Y PFS (90% CI)</b> |
| <b>21</b> | <b>18 (86%)</b> | <b>3 (14%)</b>  | <b>4.57 (3.45, 5.95)</b>   | <b>0.29 (0.14, 0.45)</b> |

Supplemental Figure 2

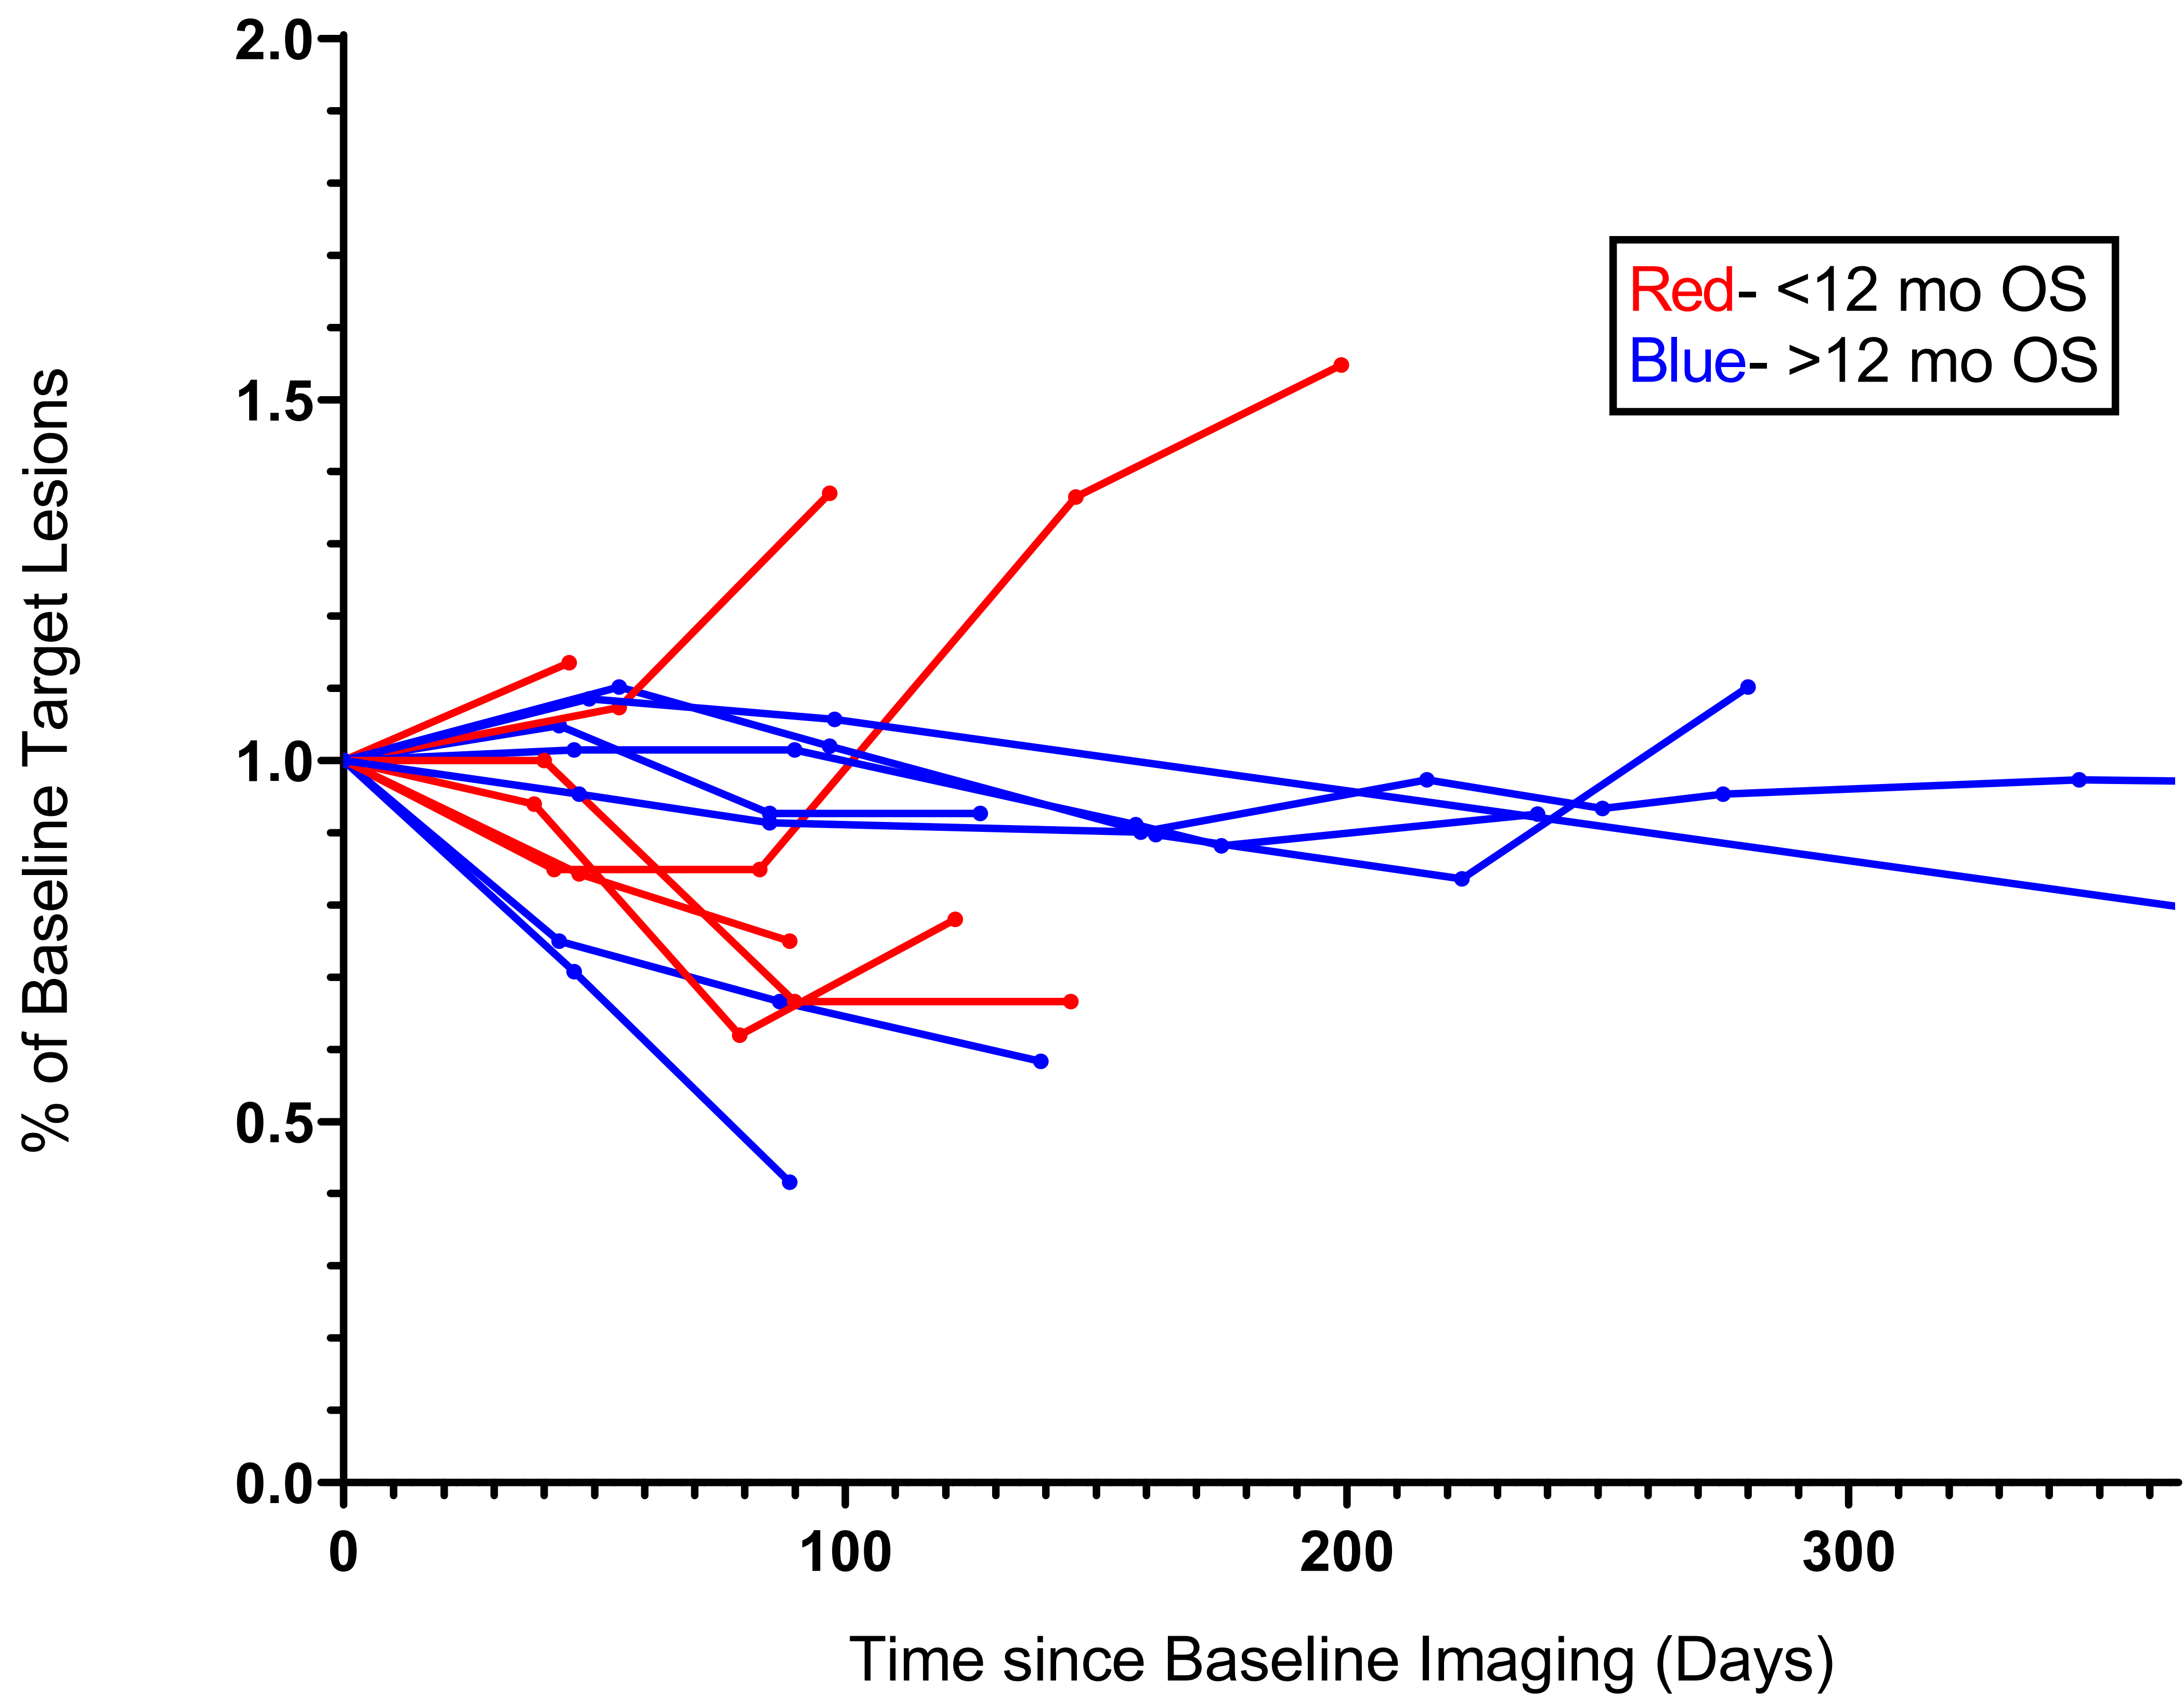

# Supplemental Figure 3

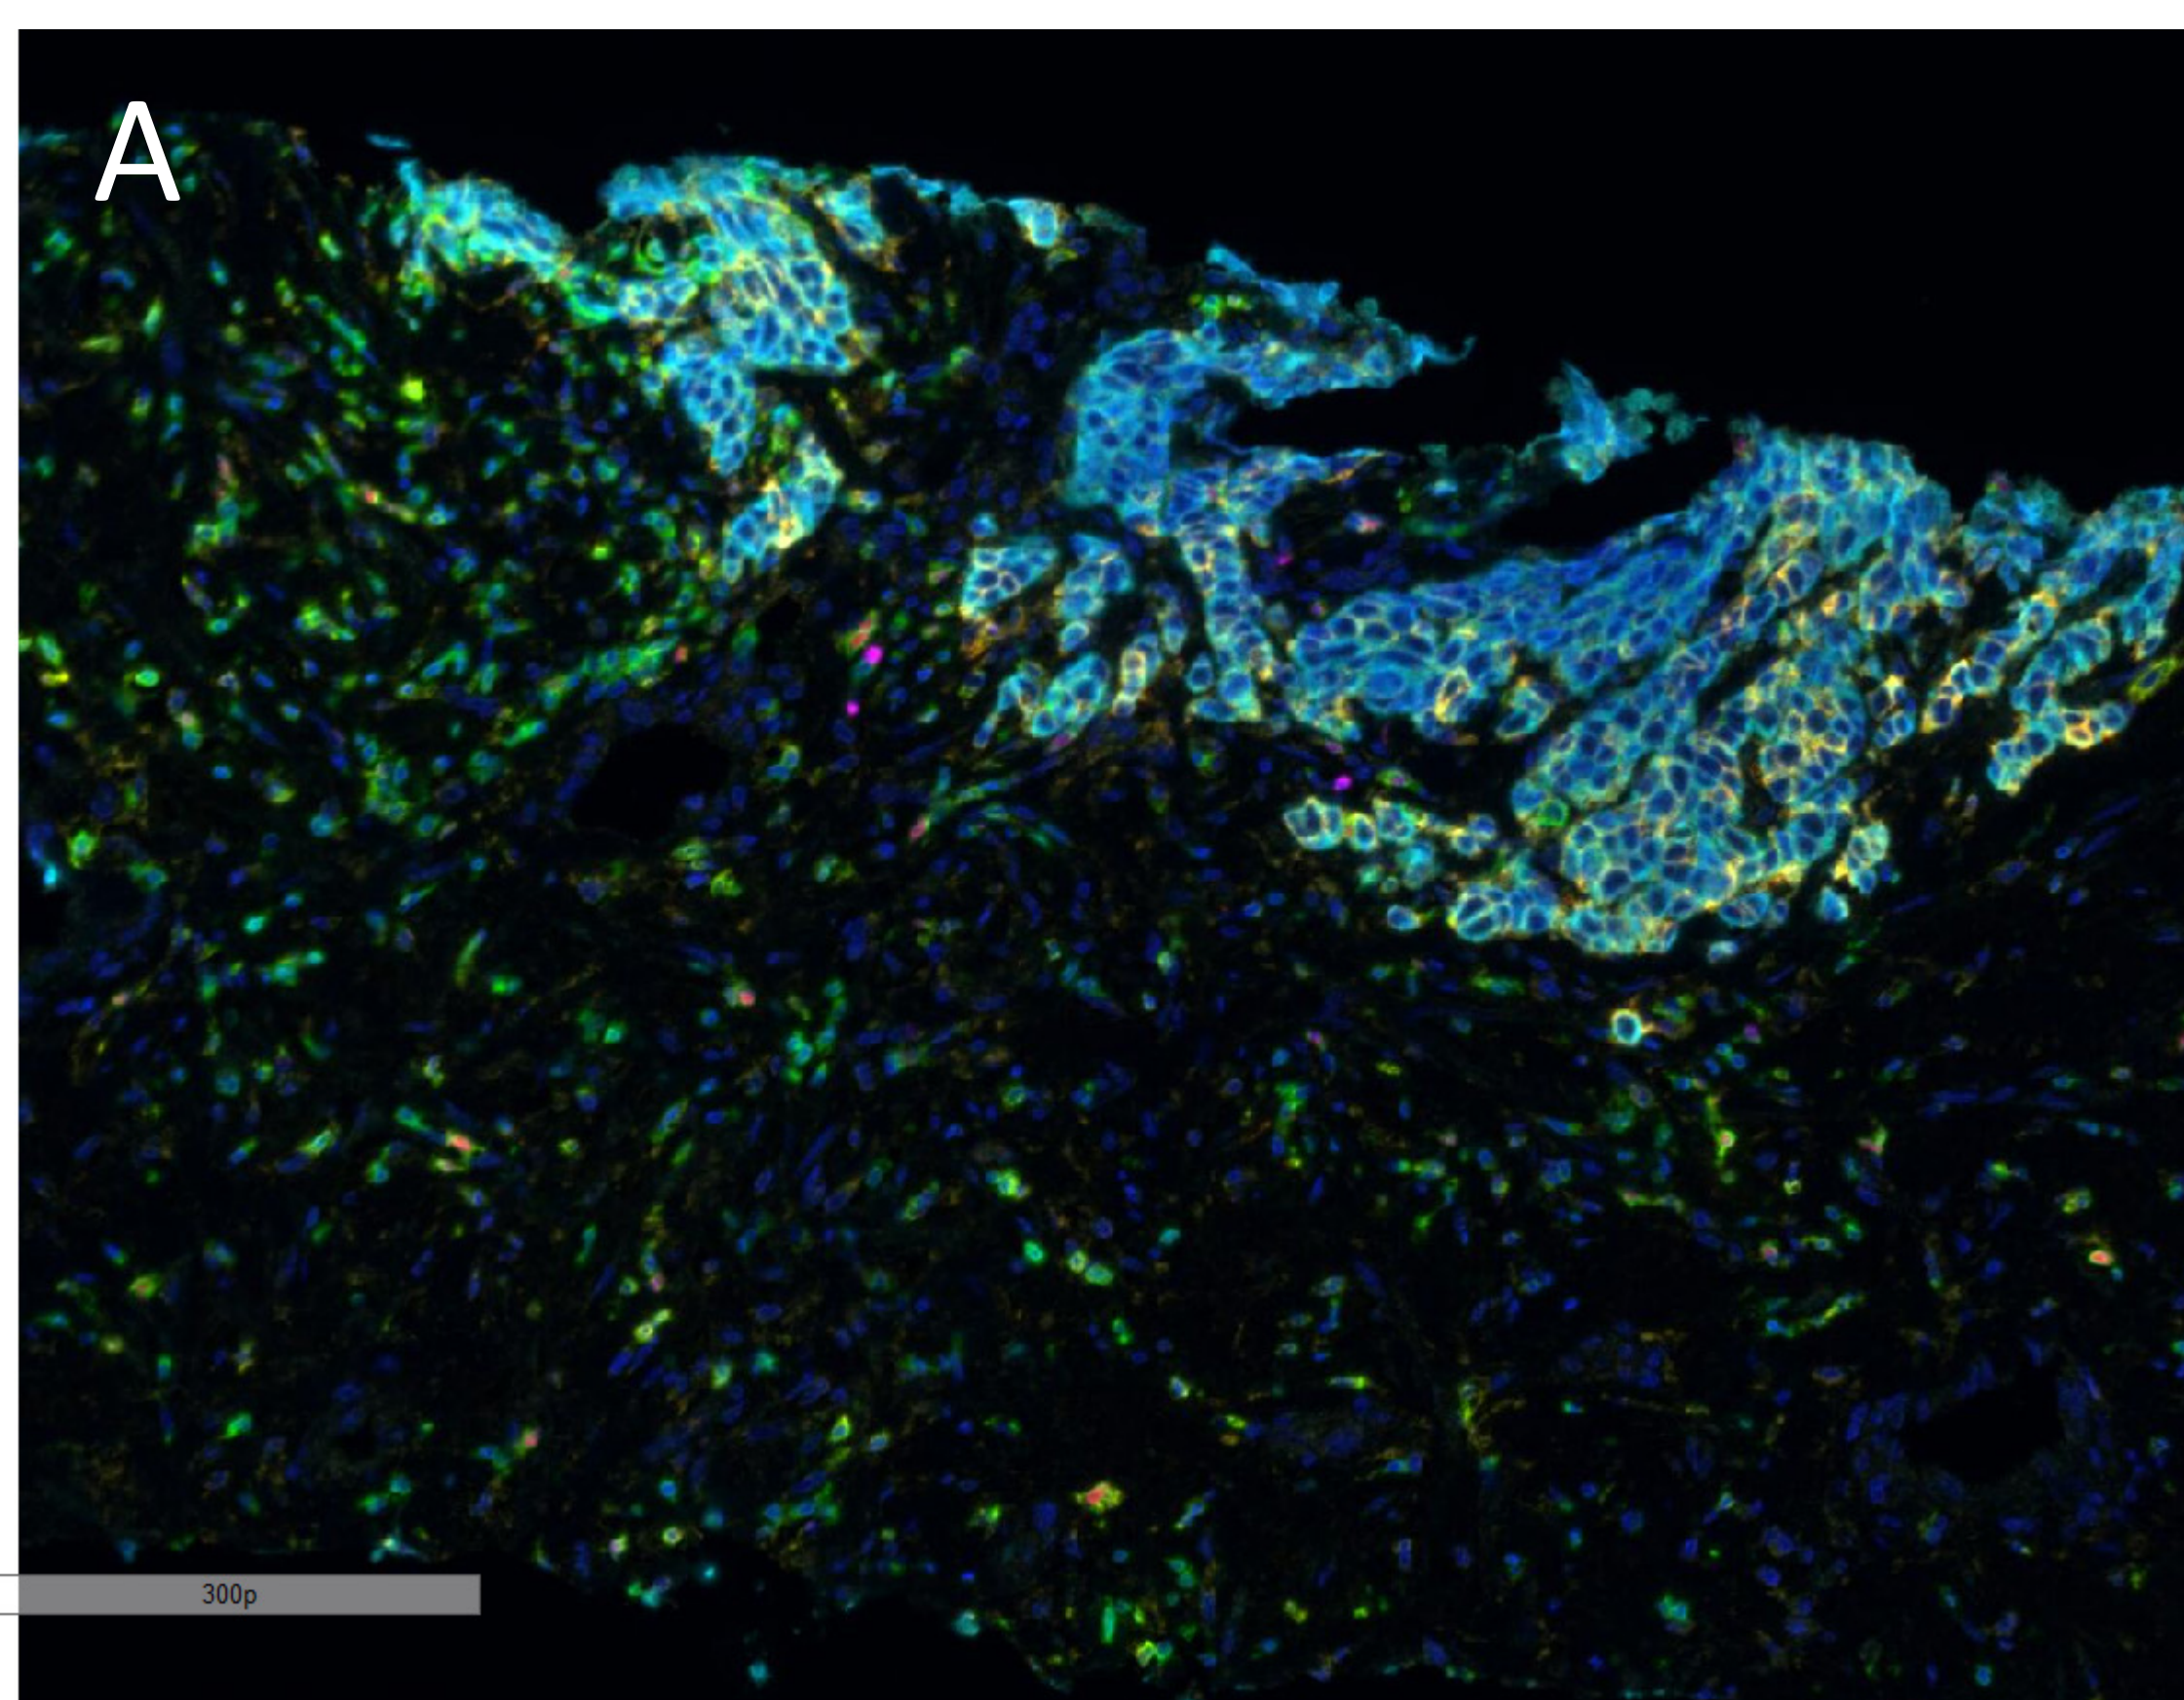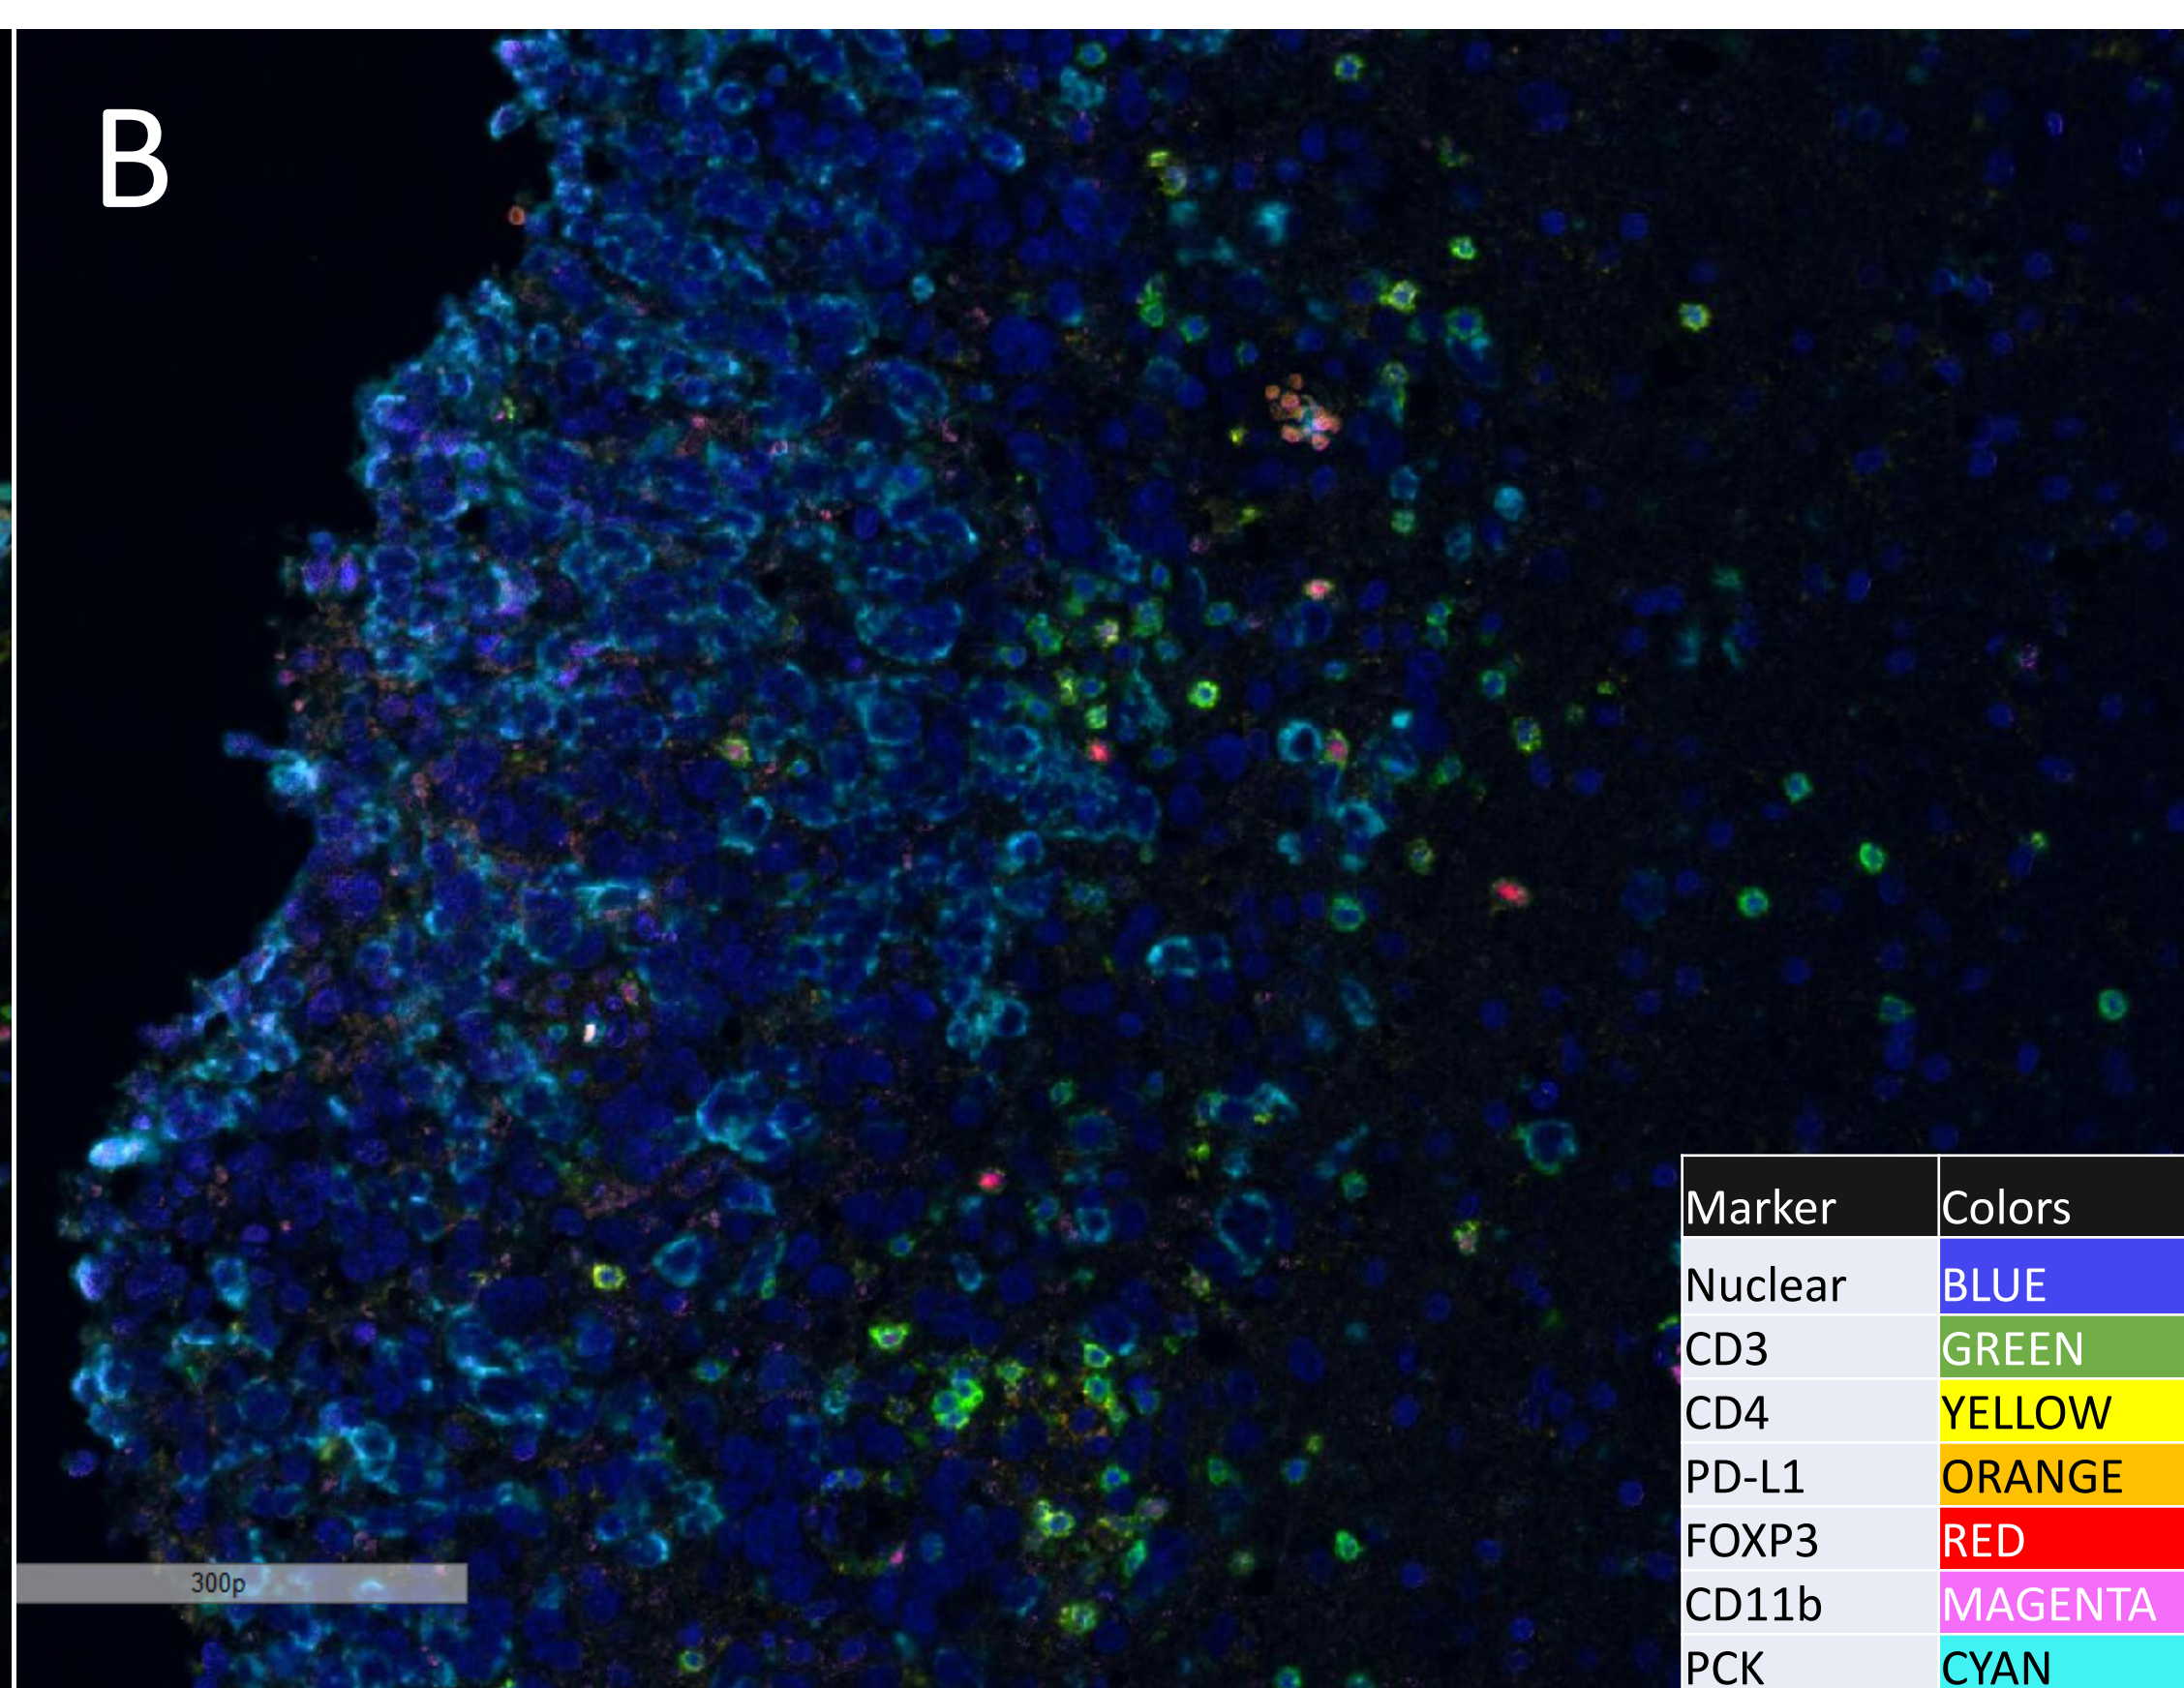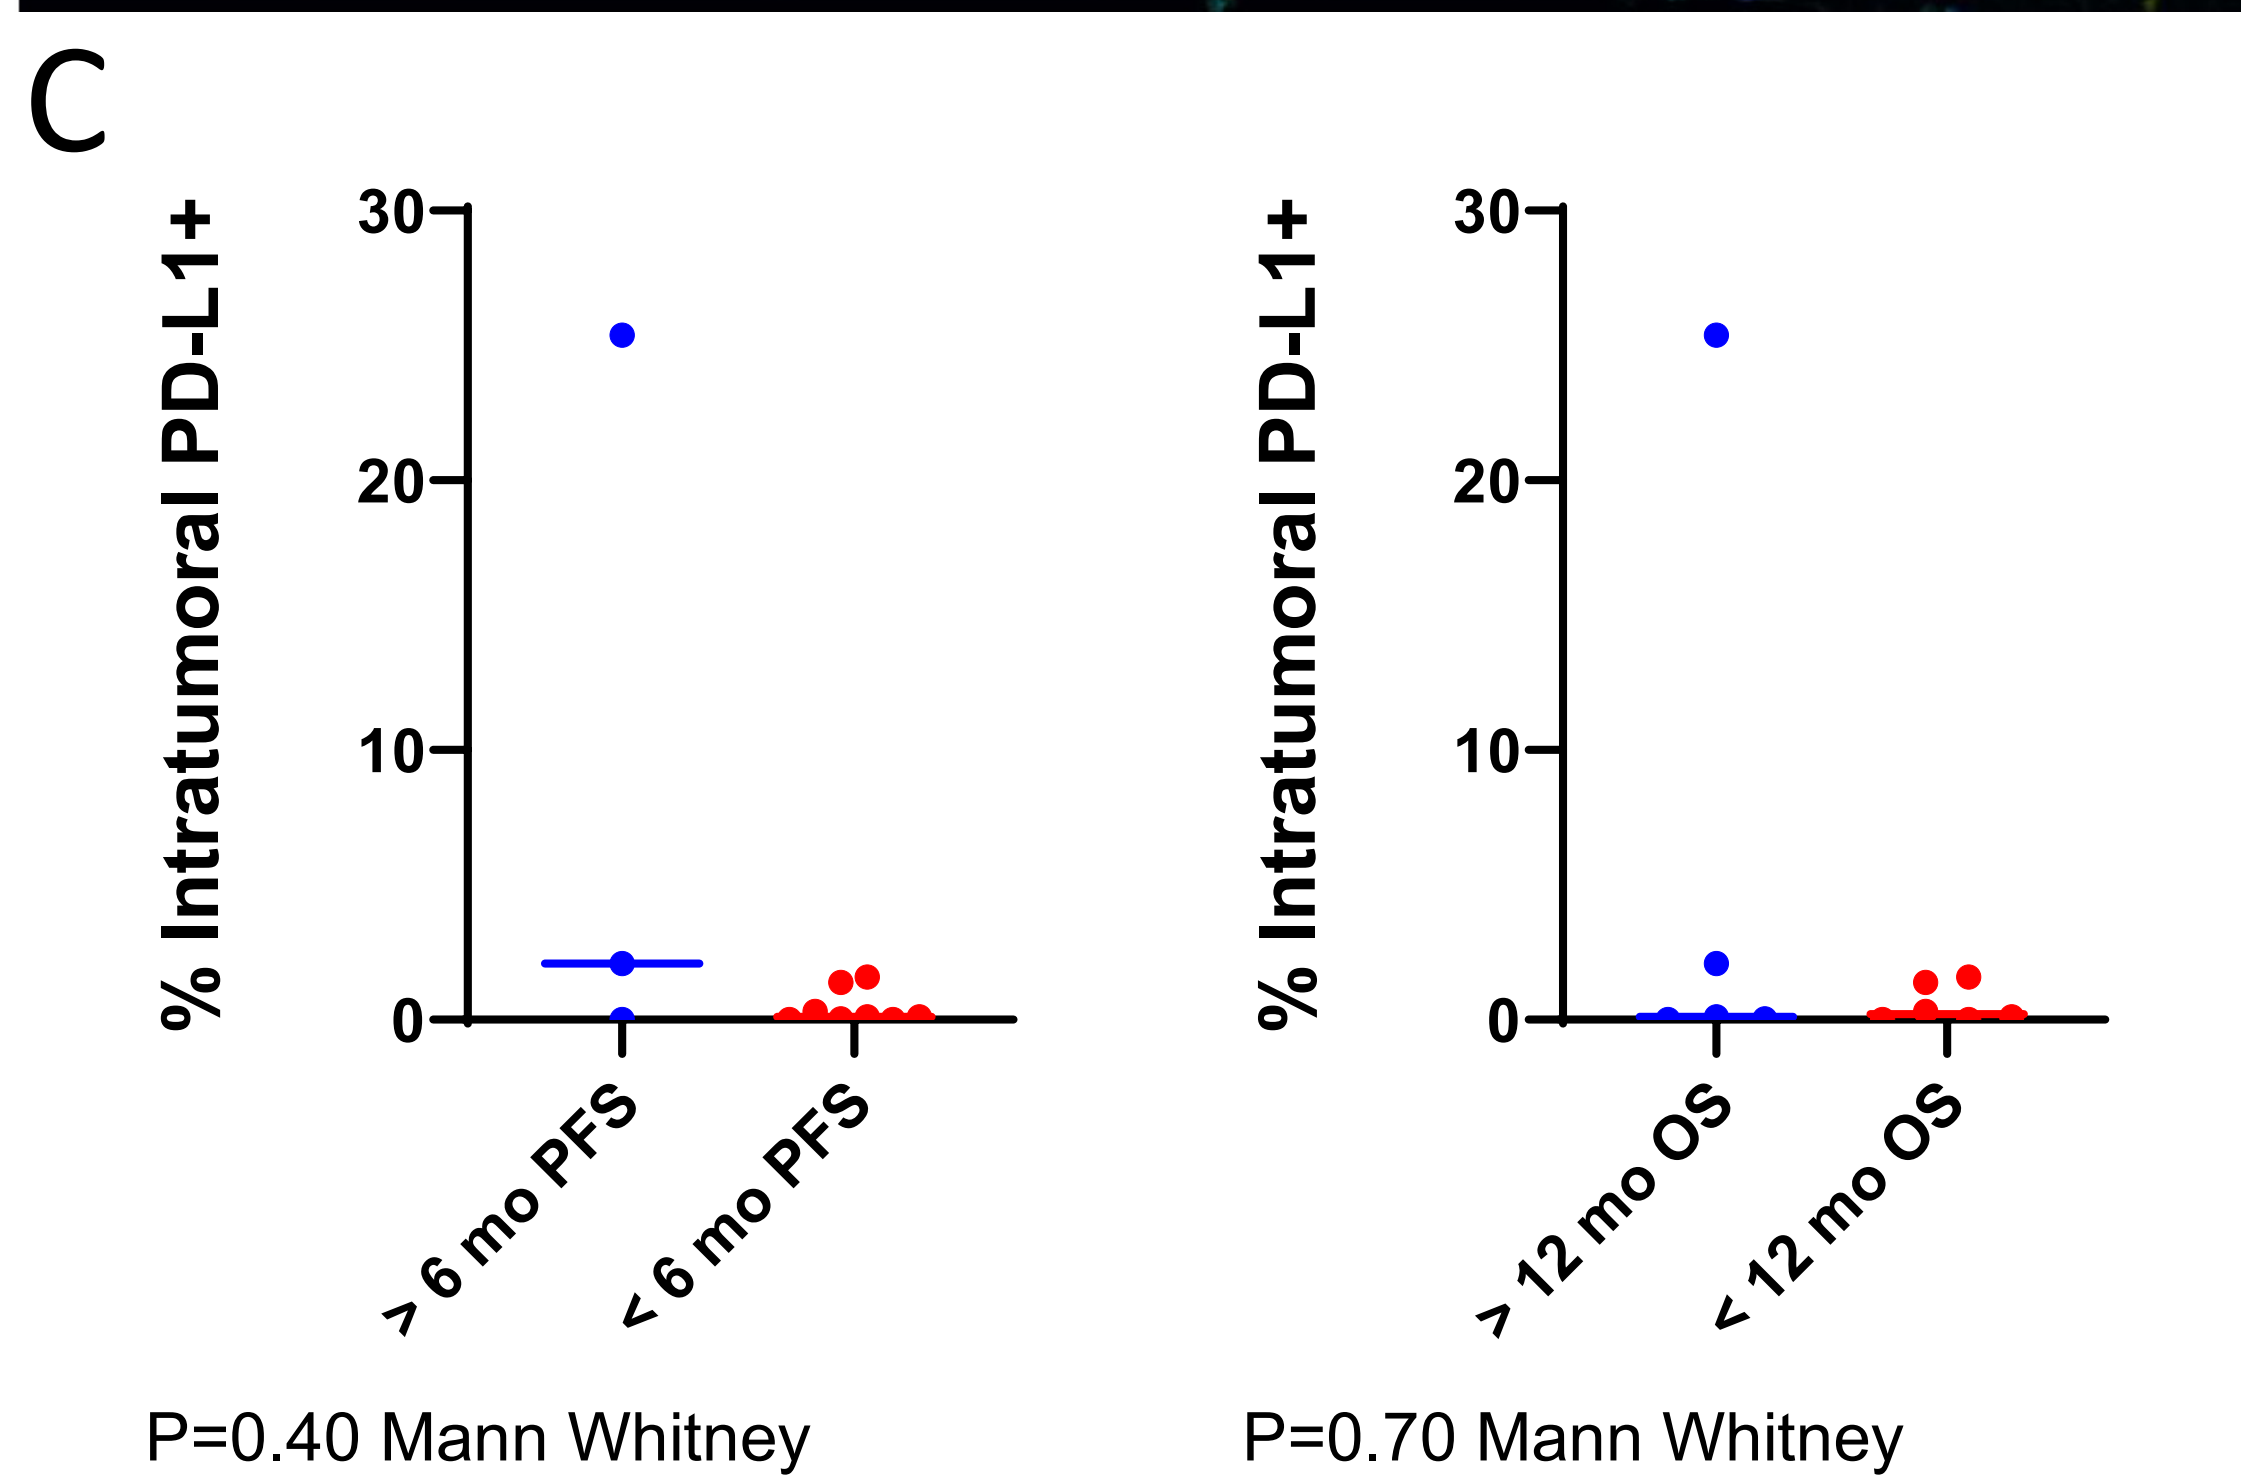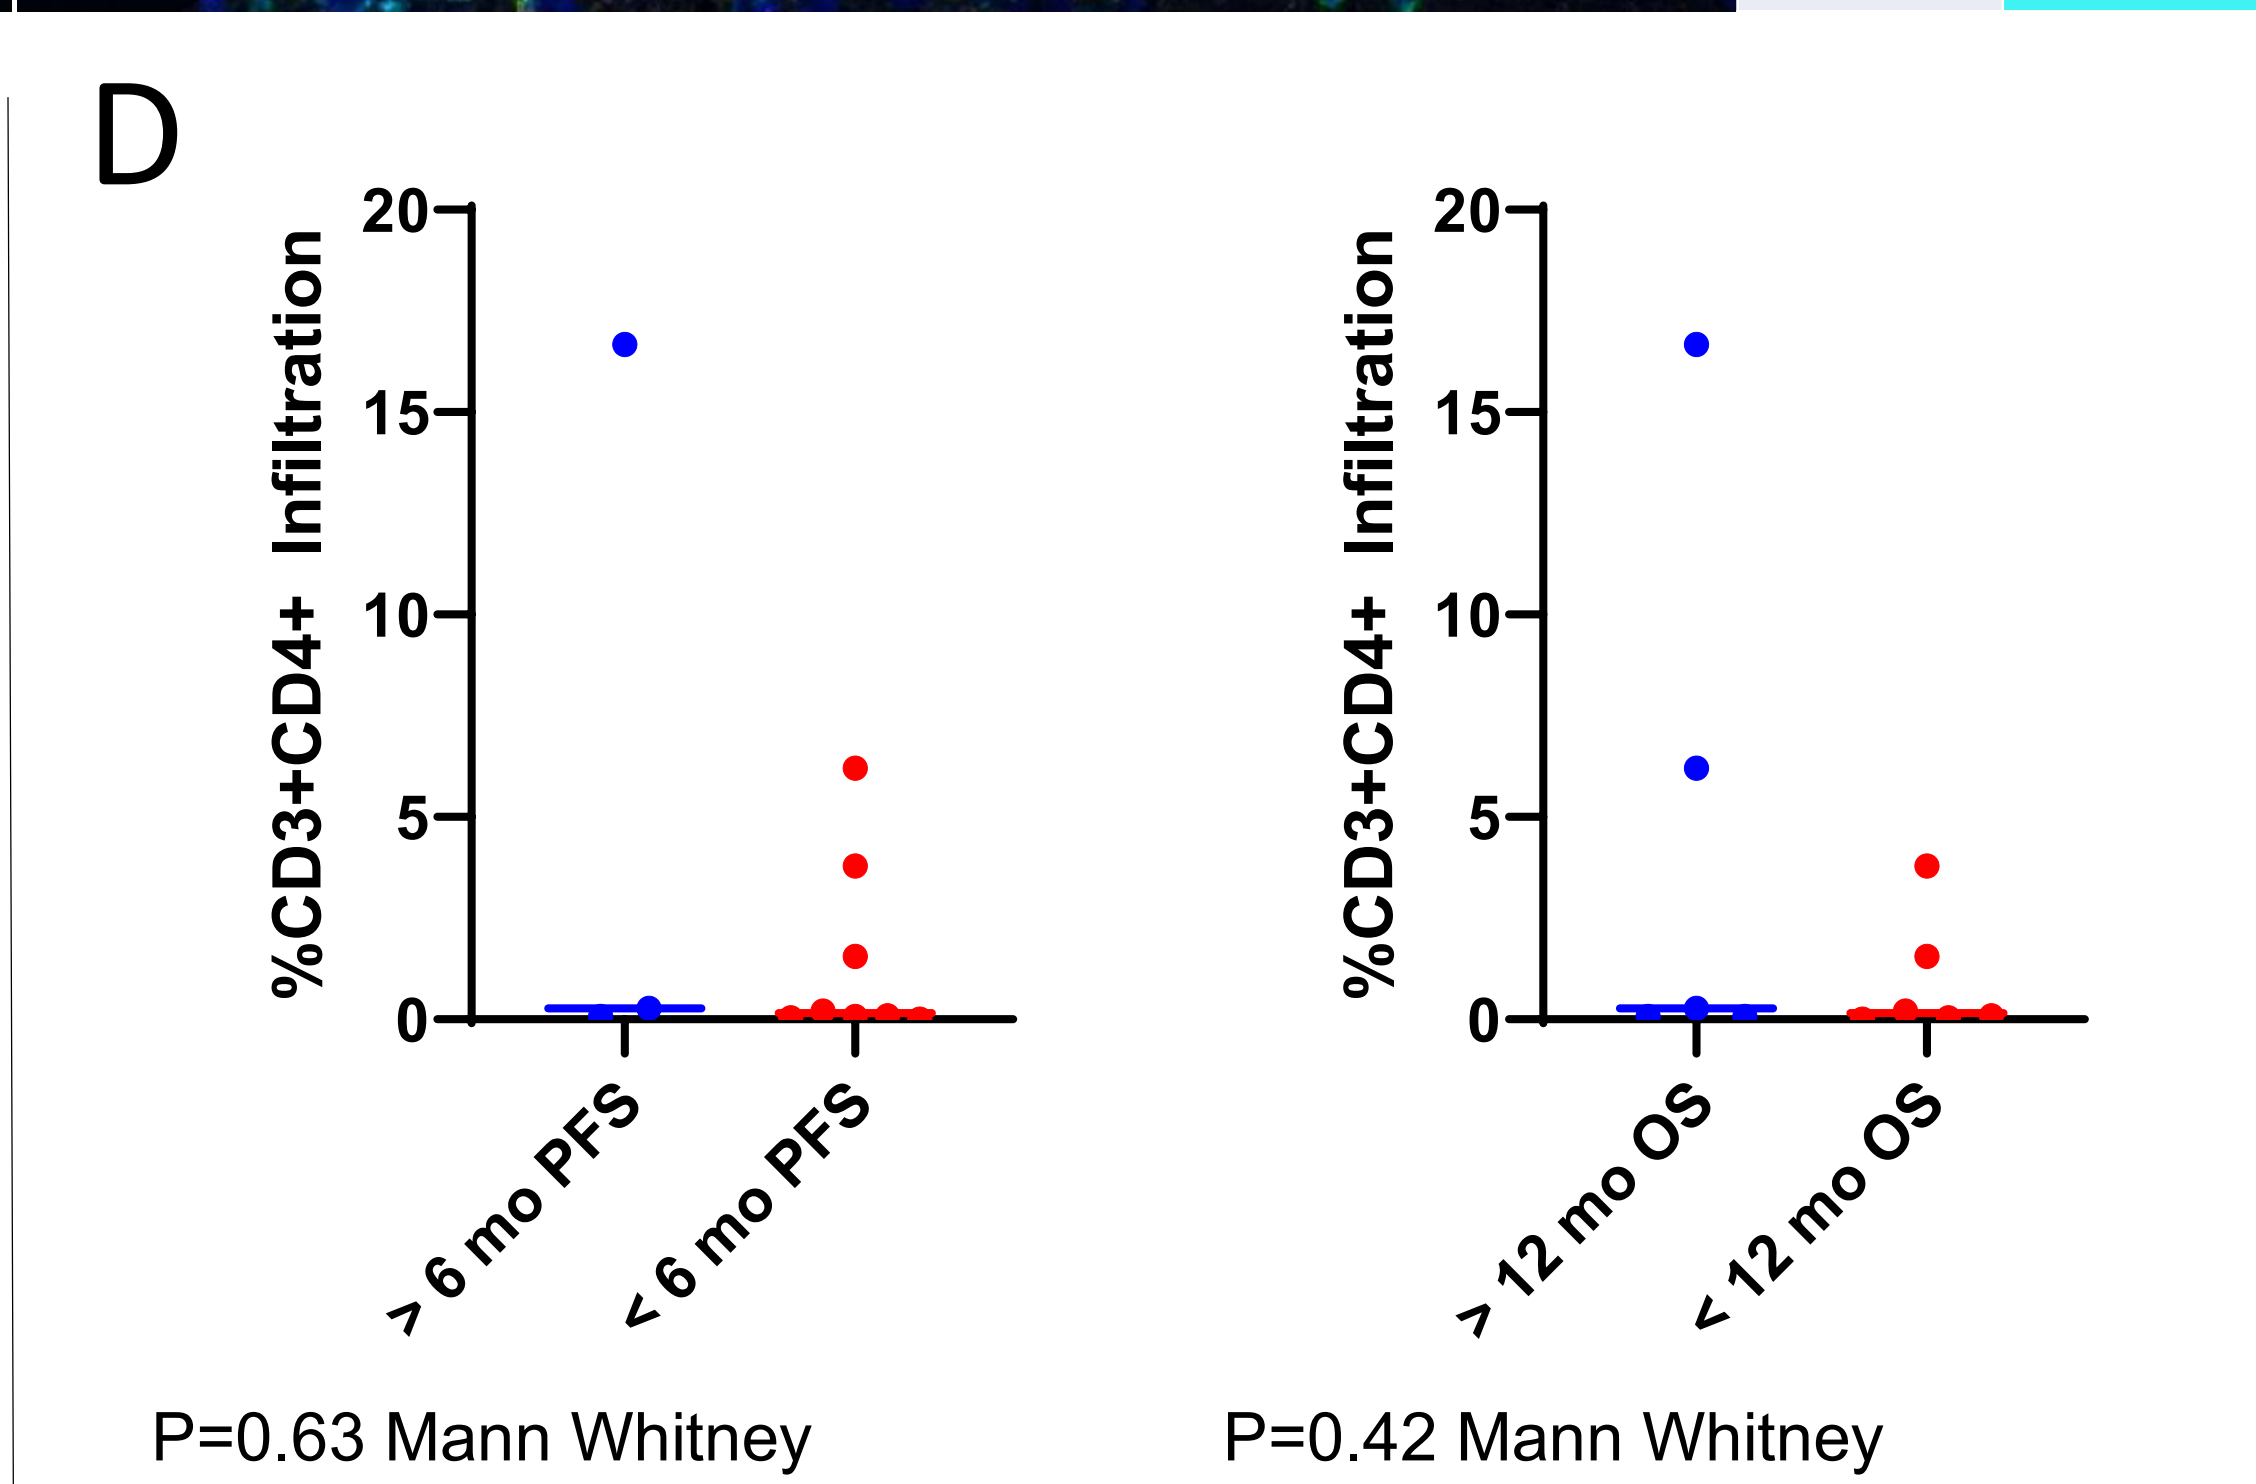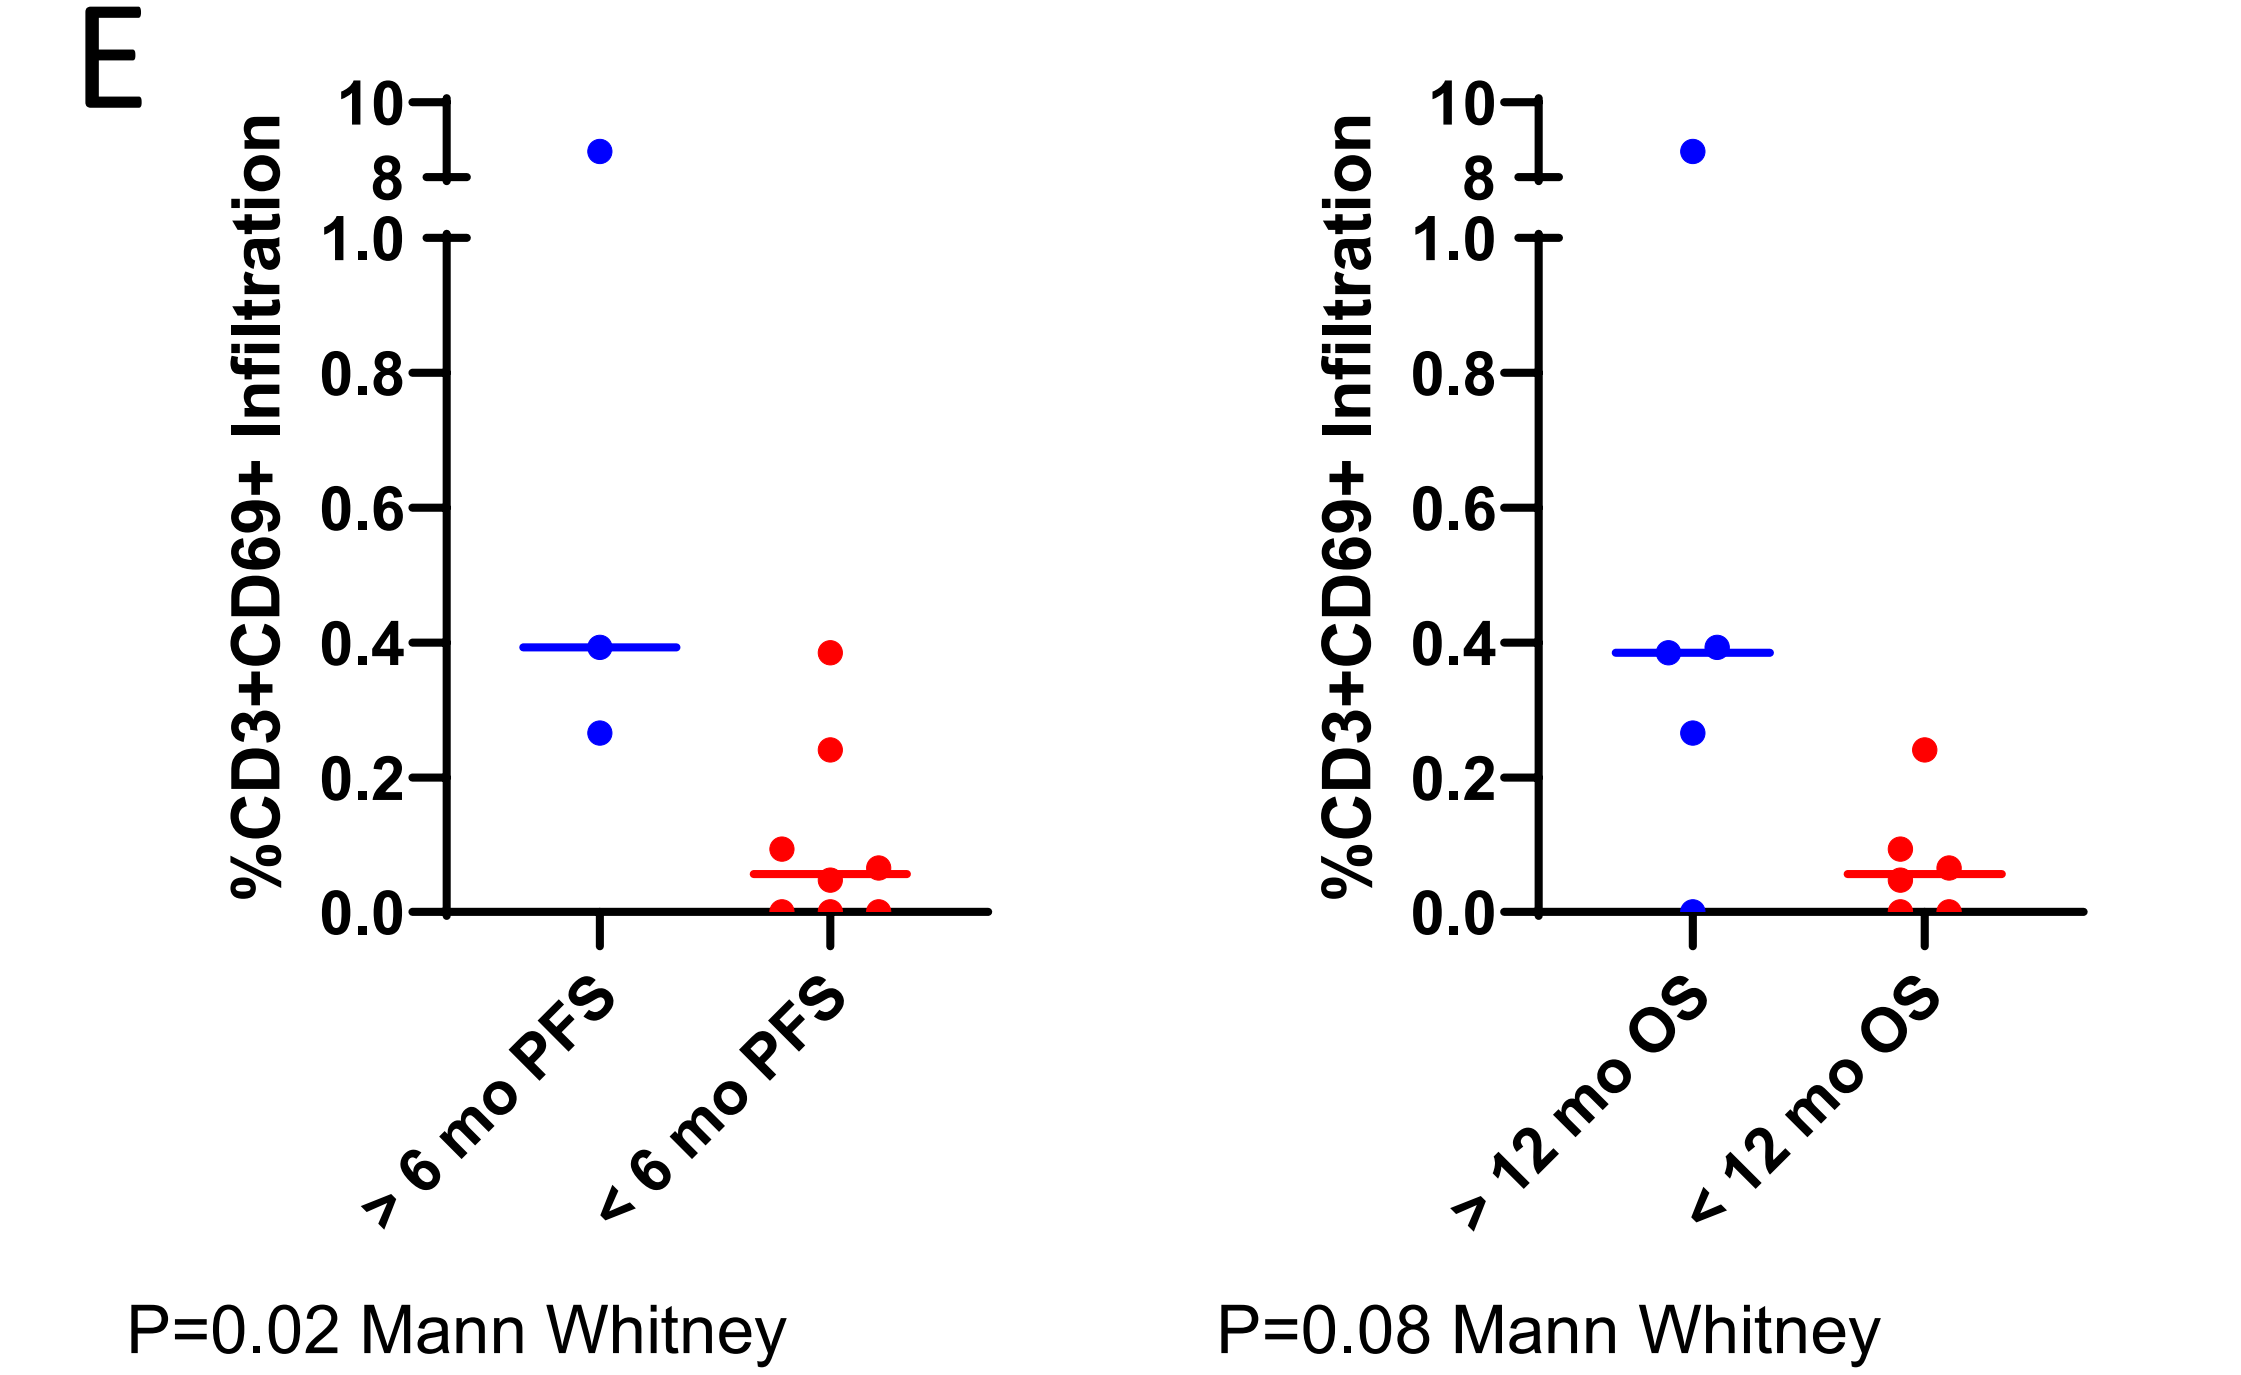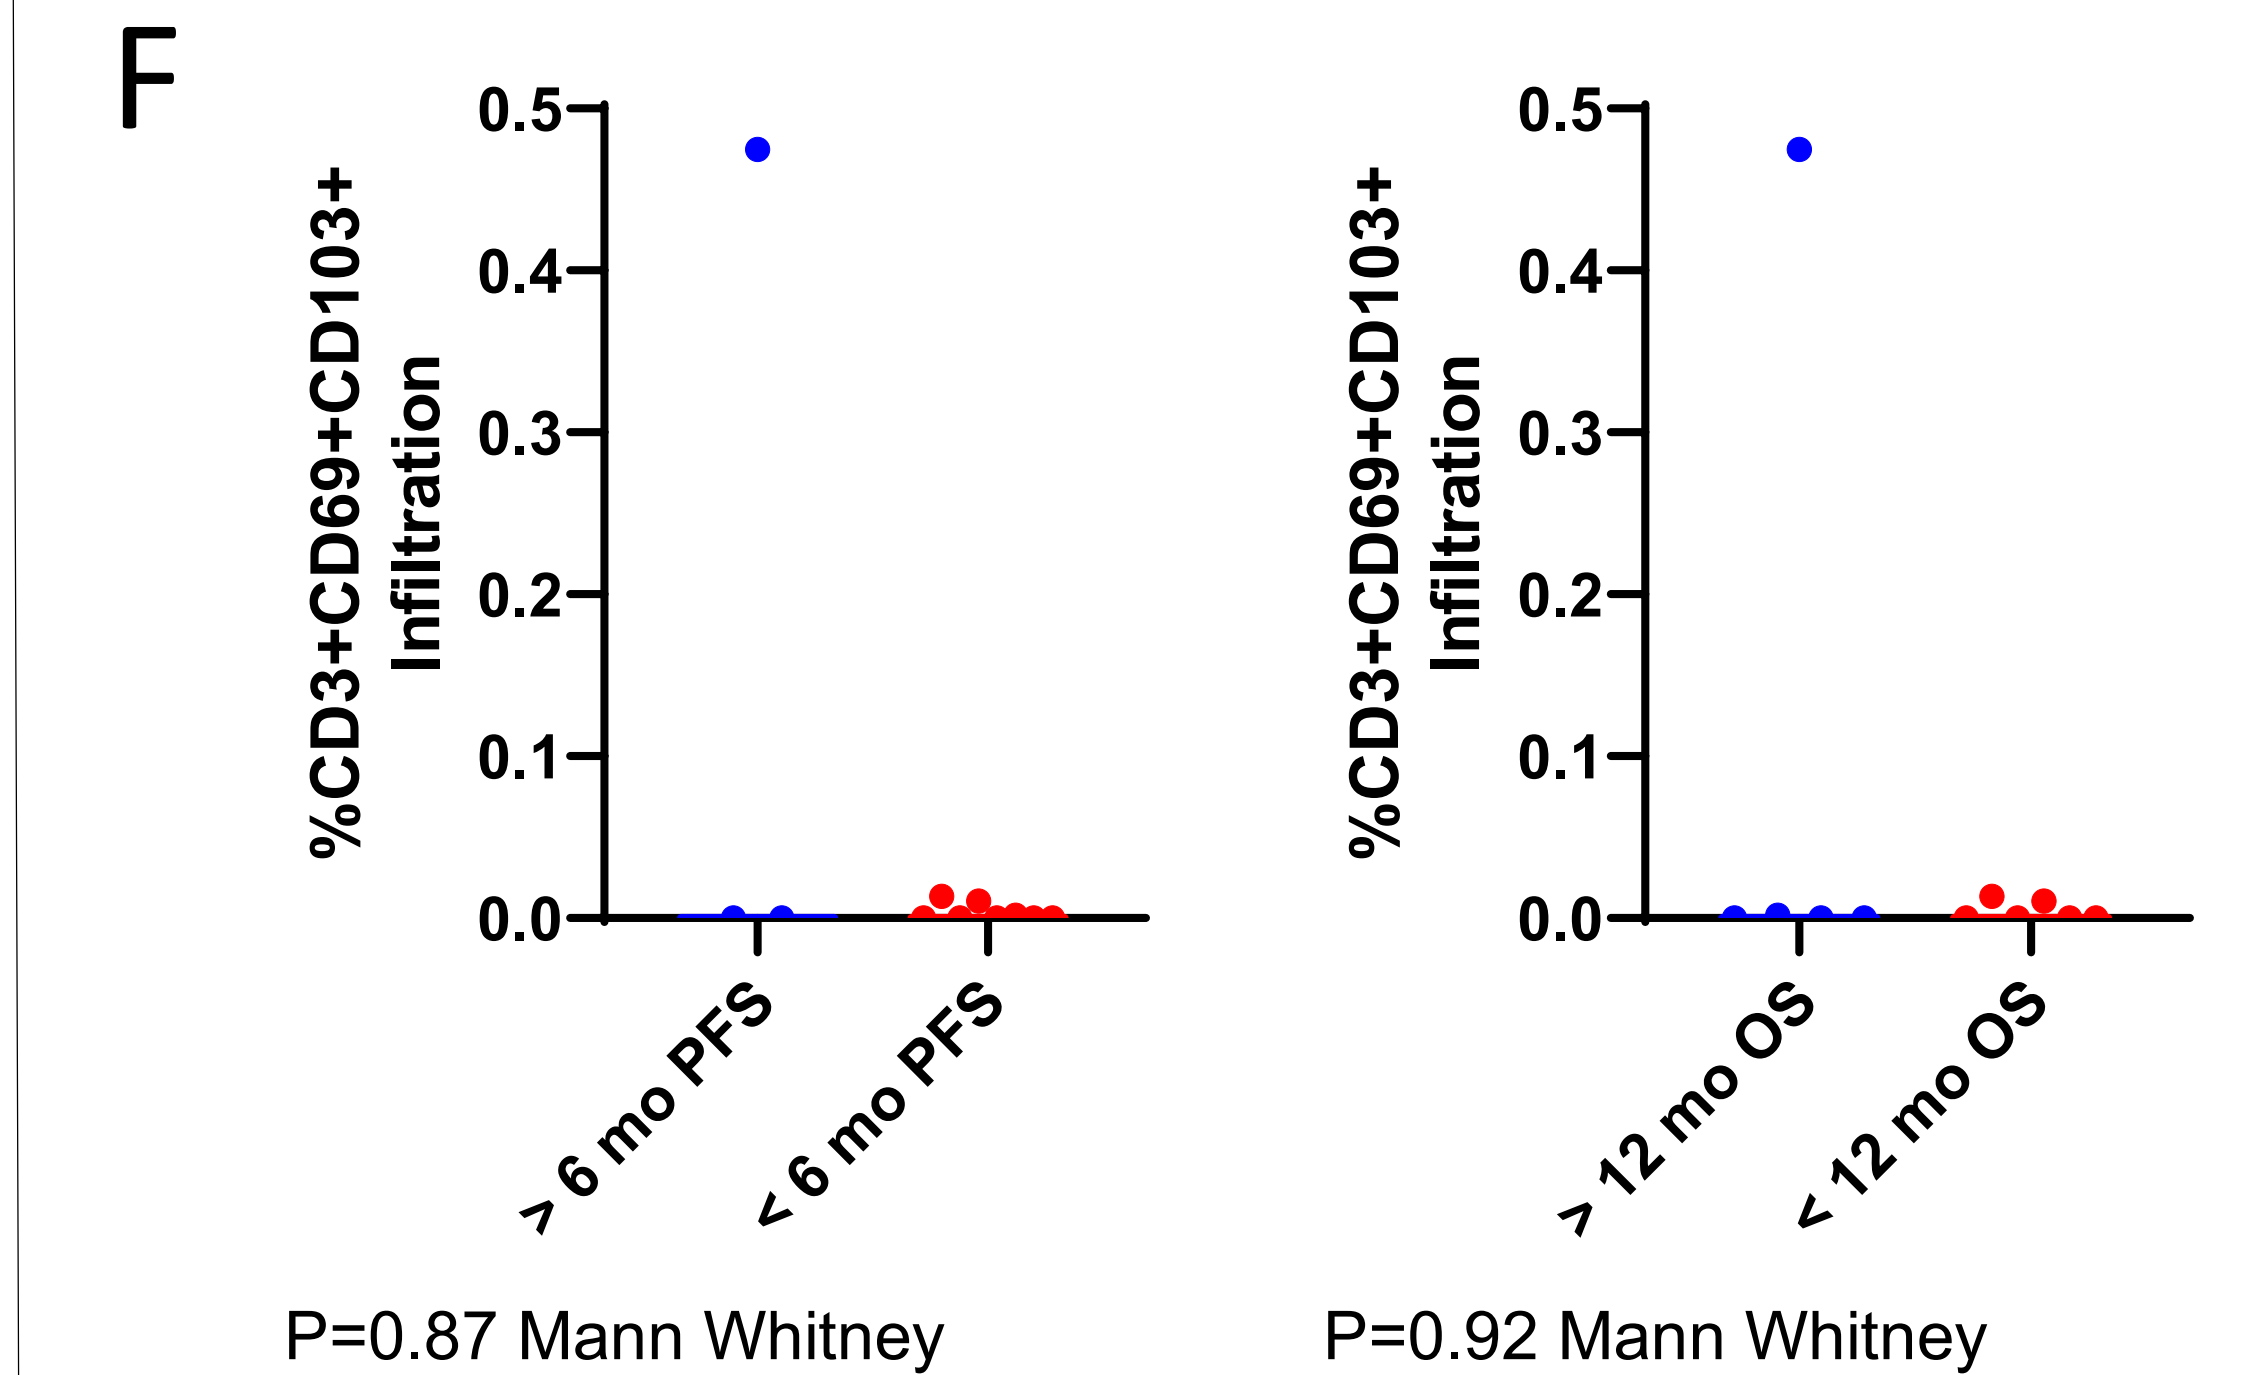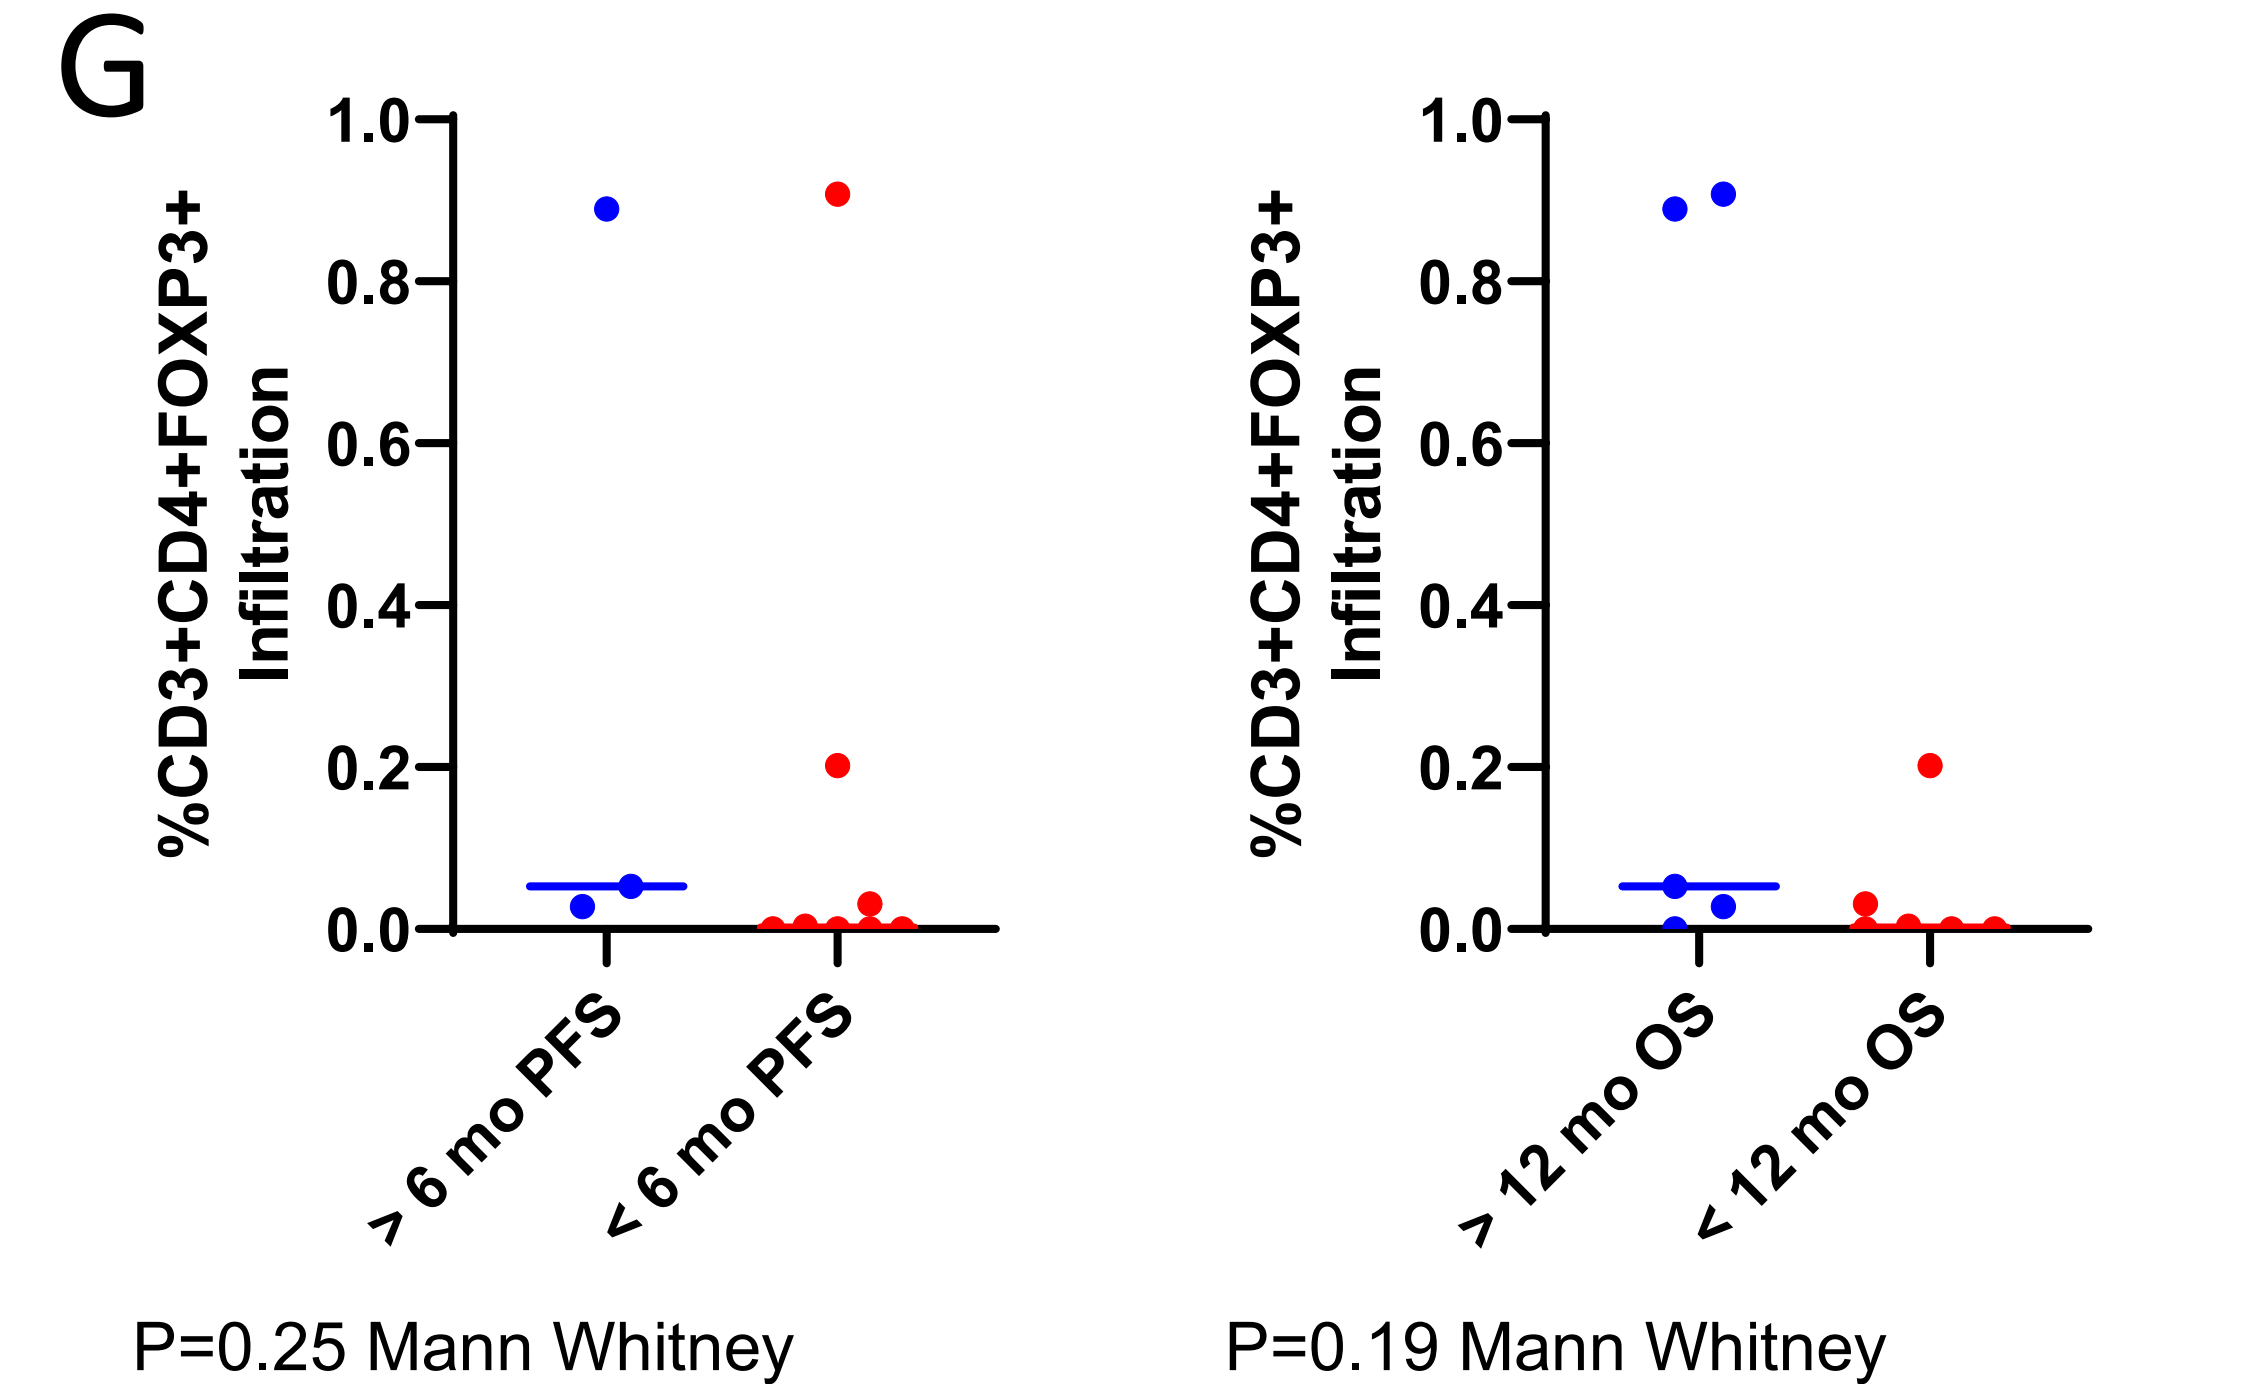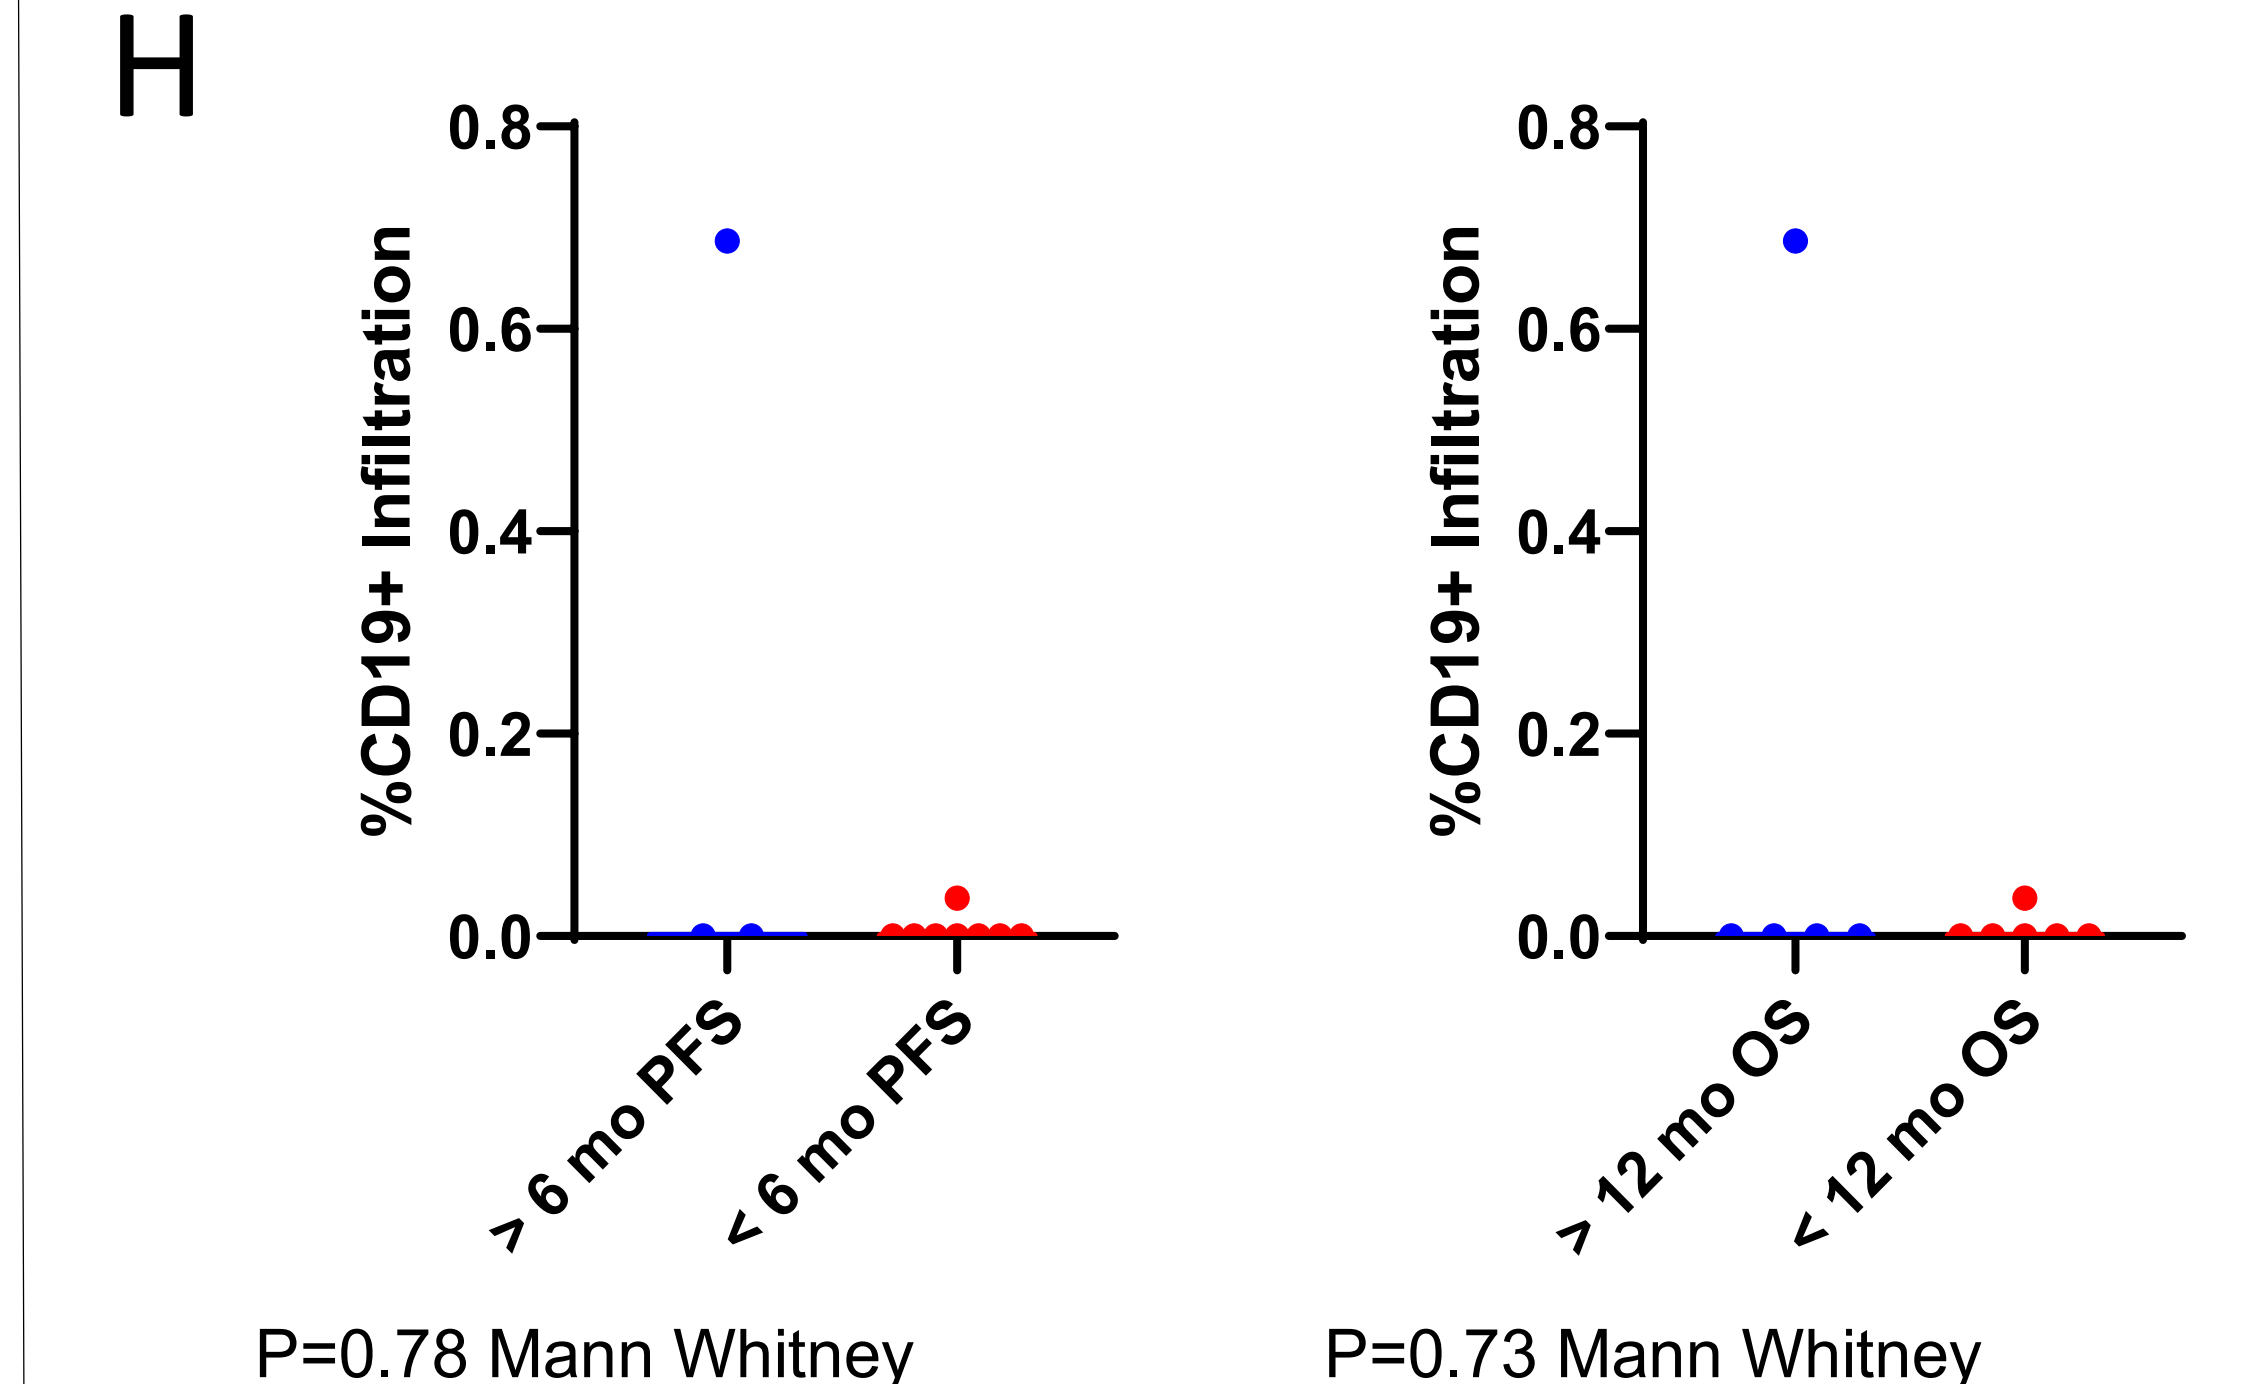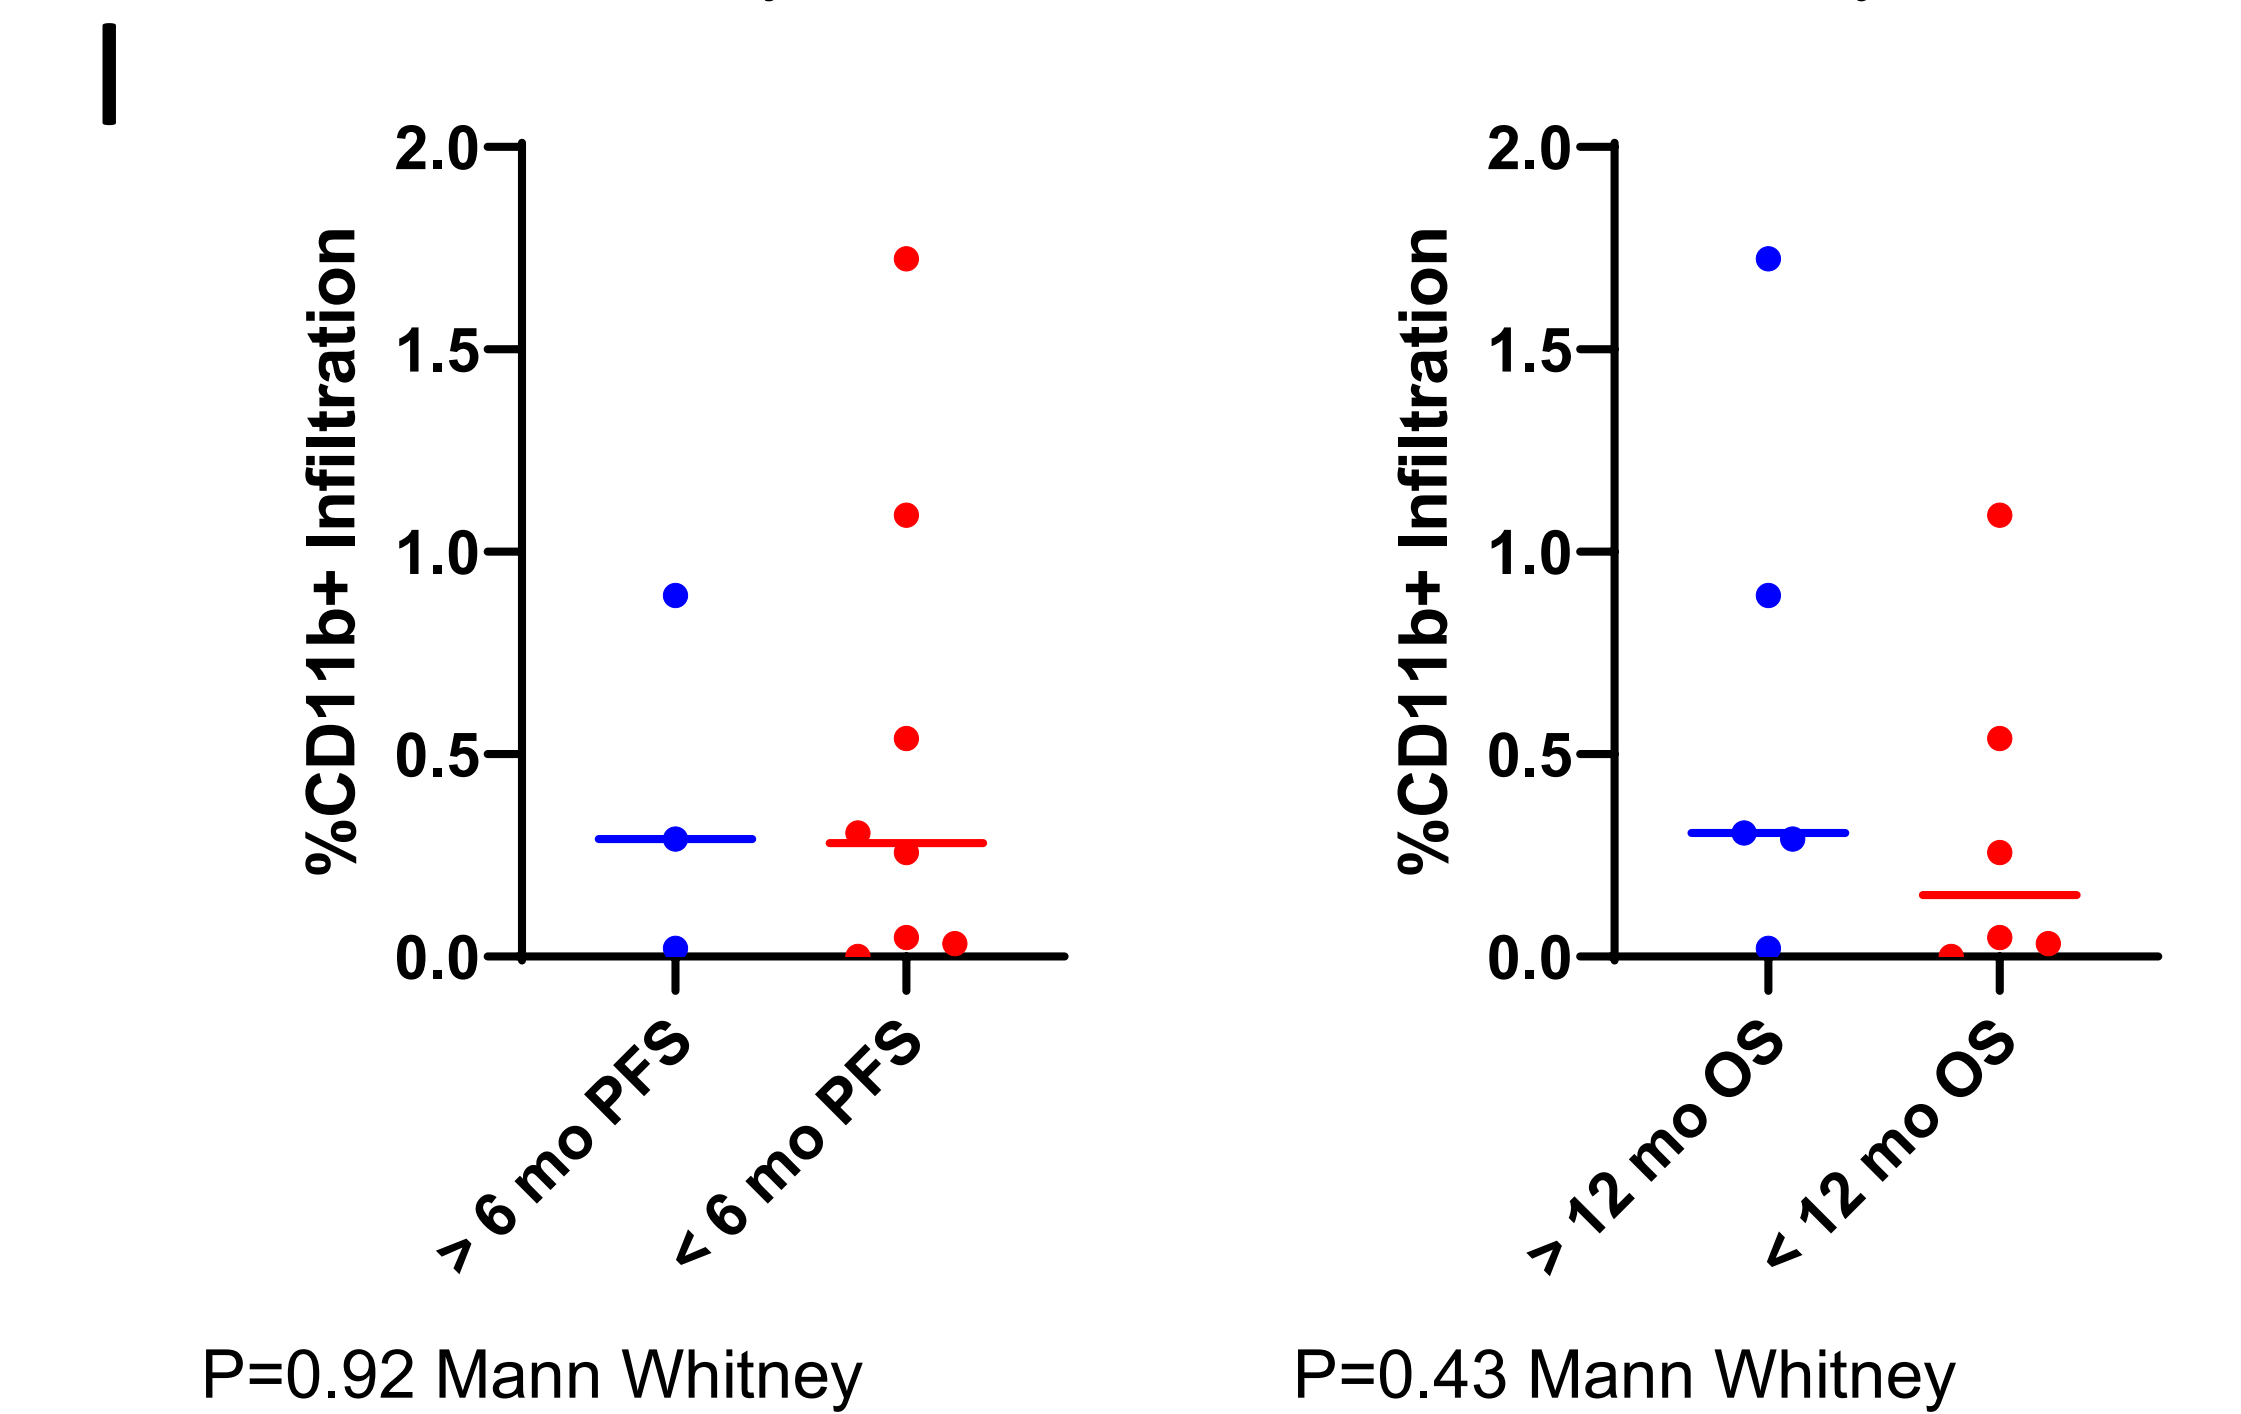

# Supplemental Figure 4

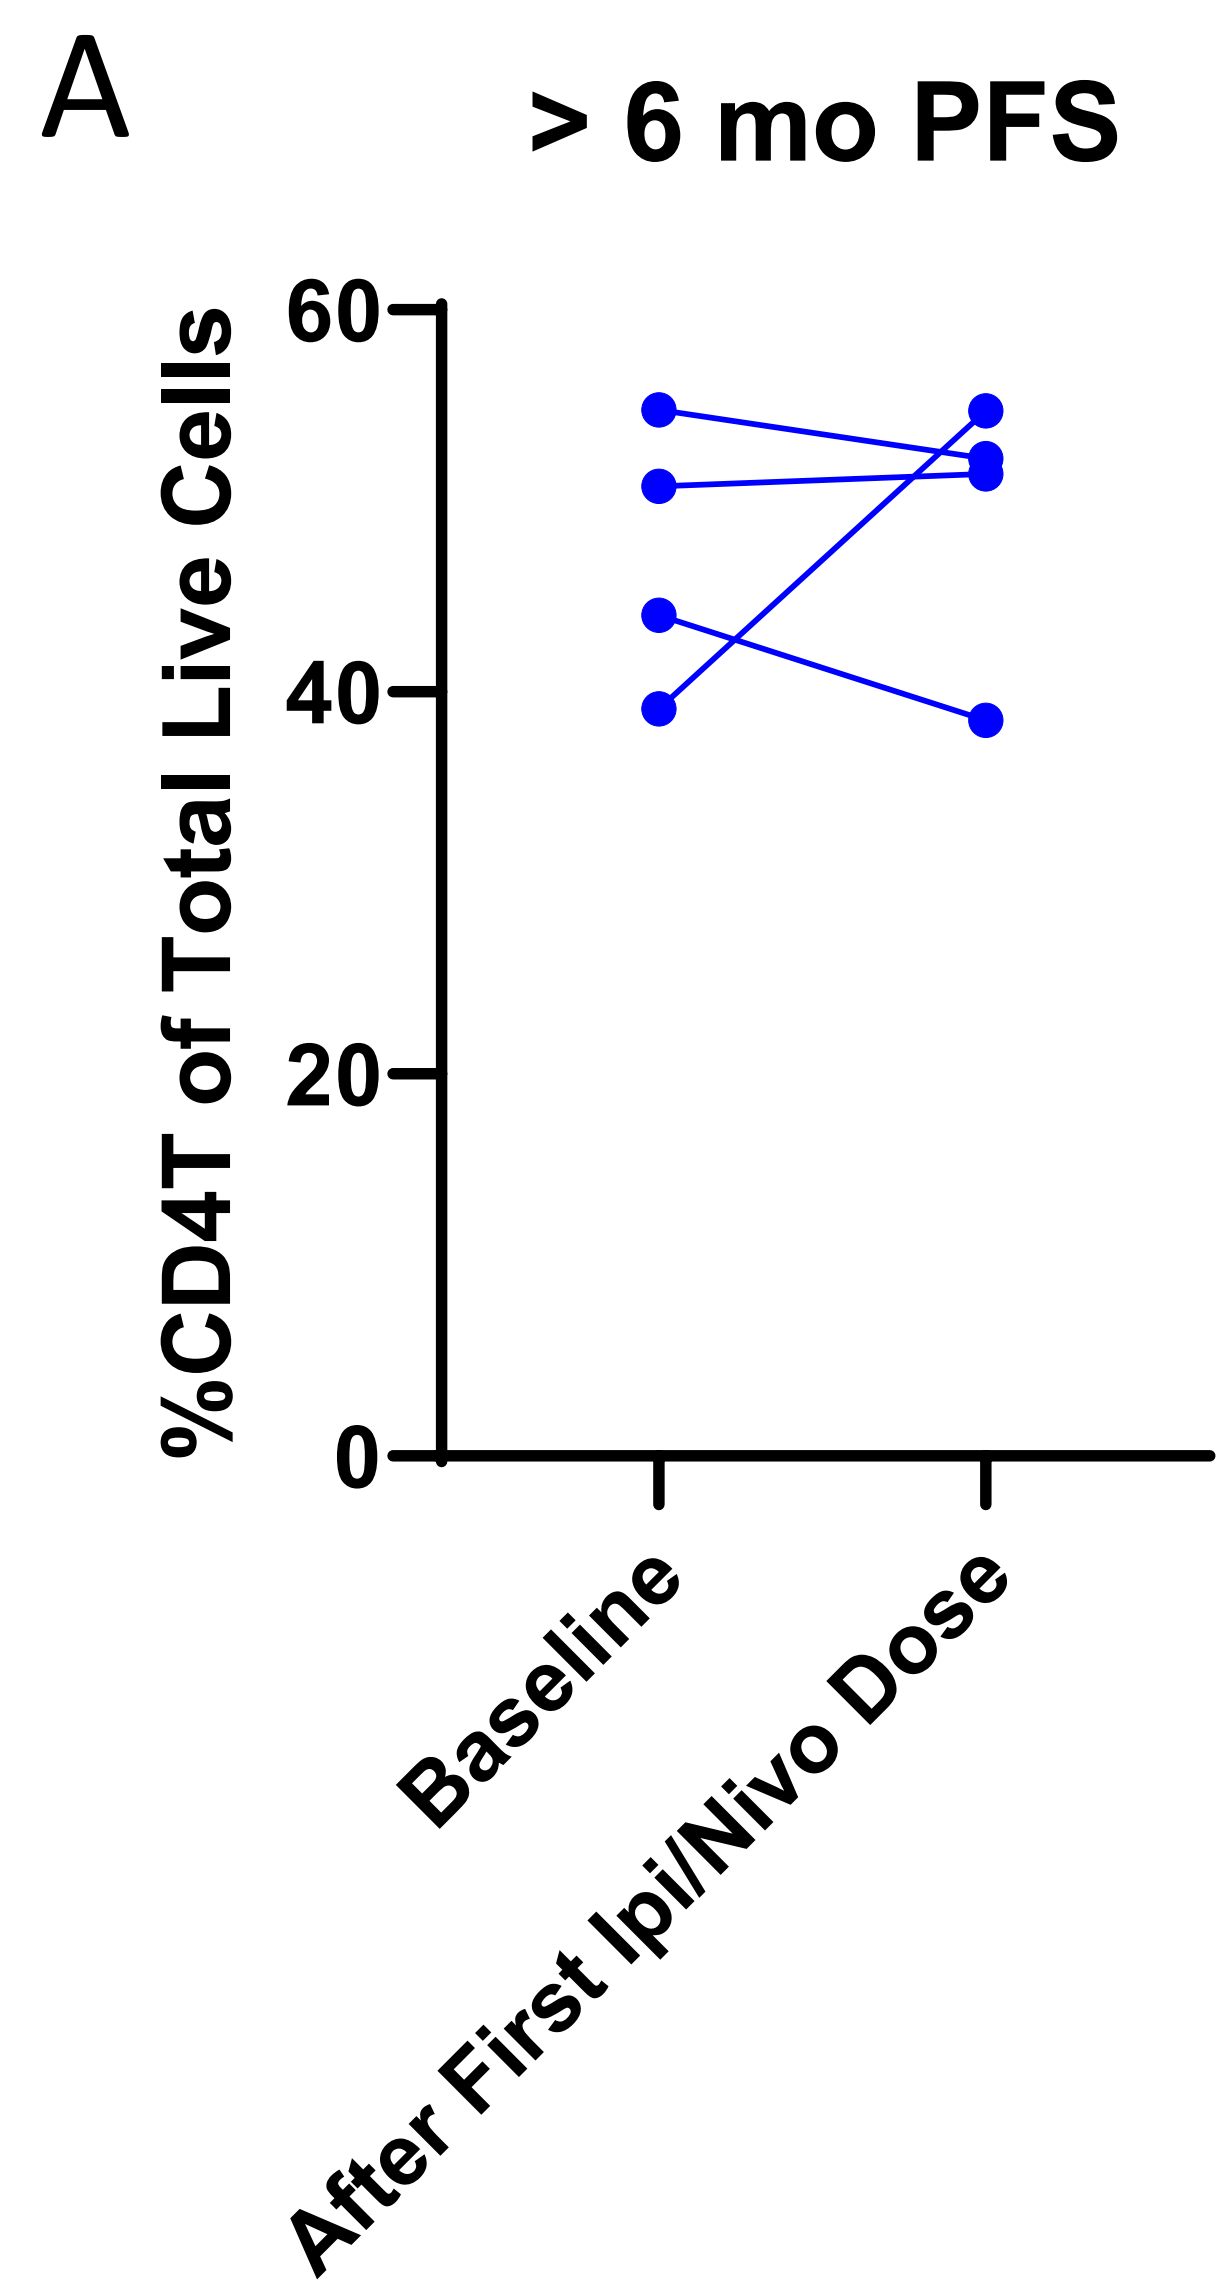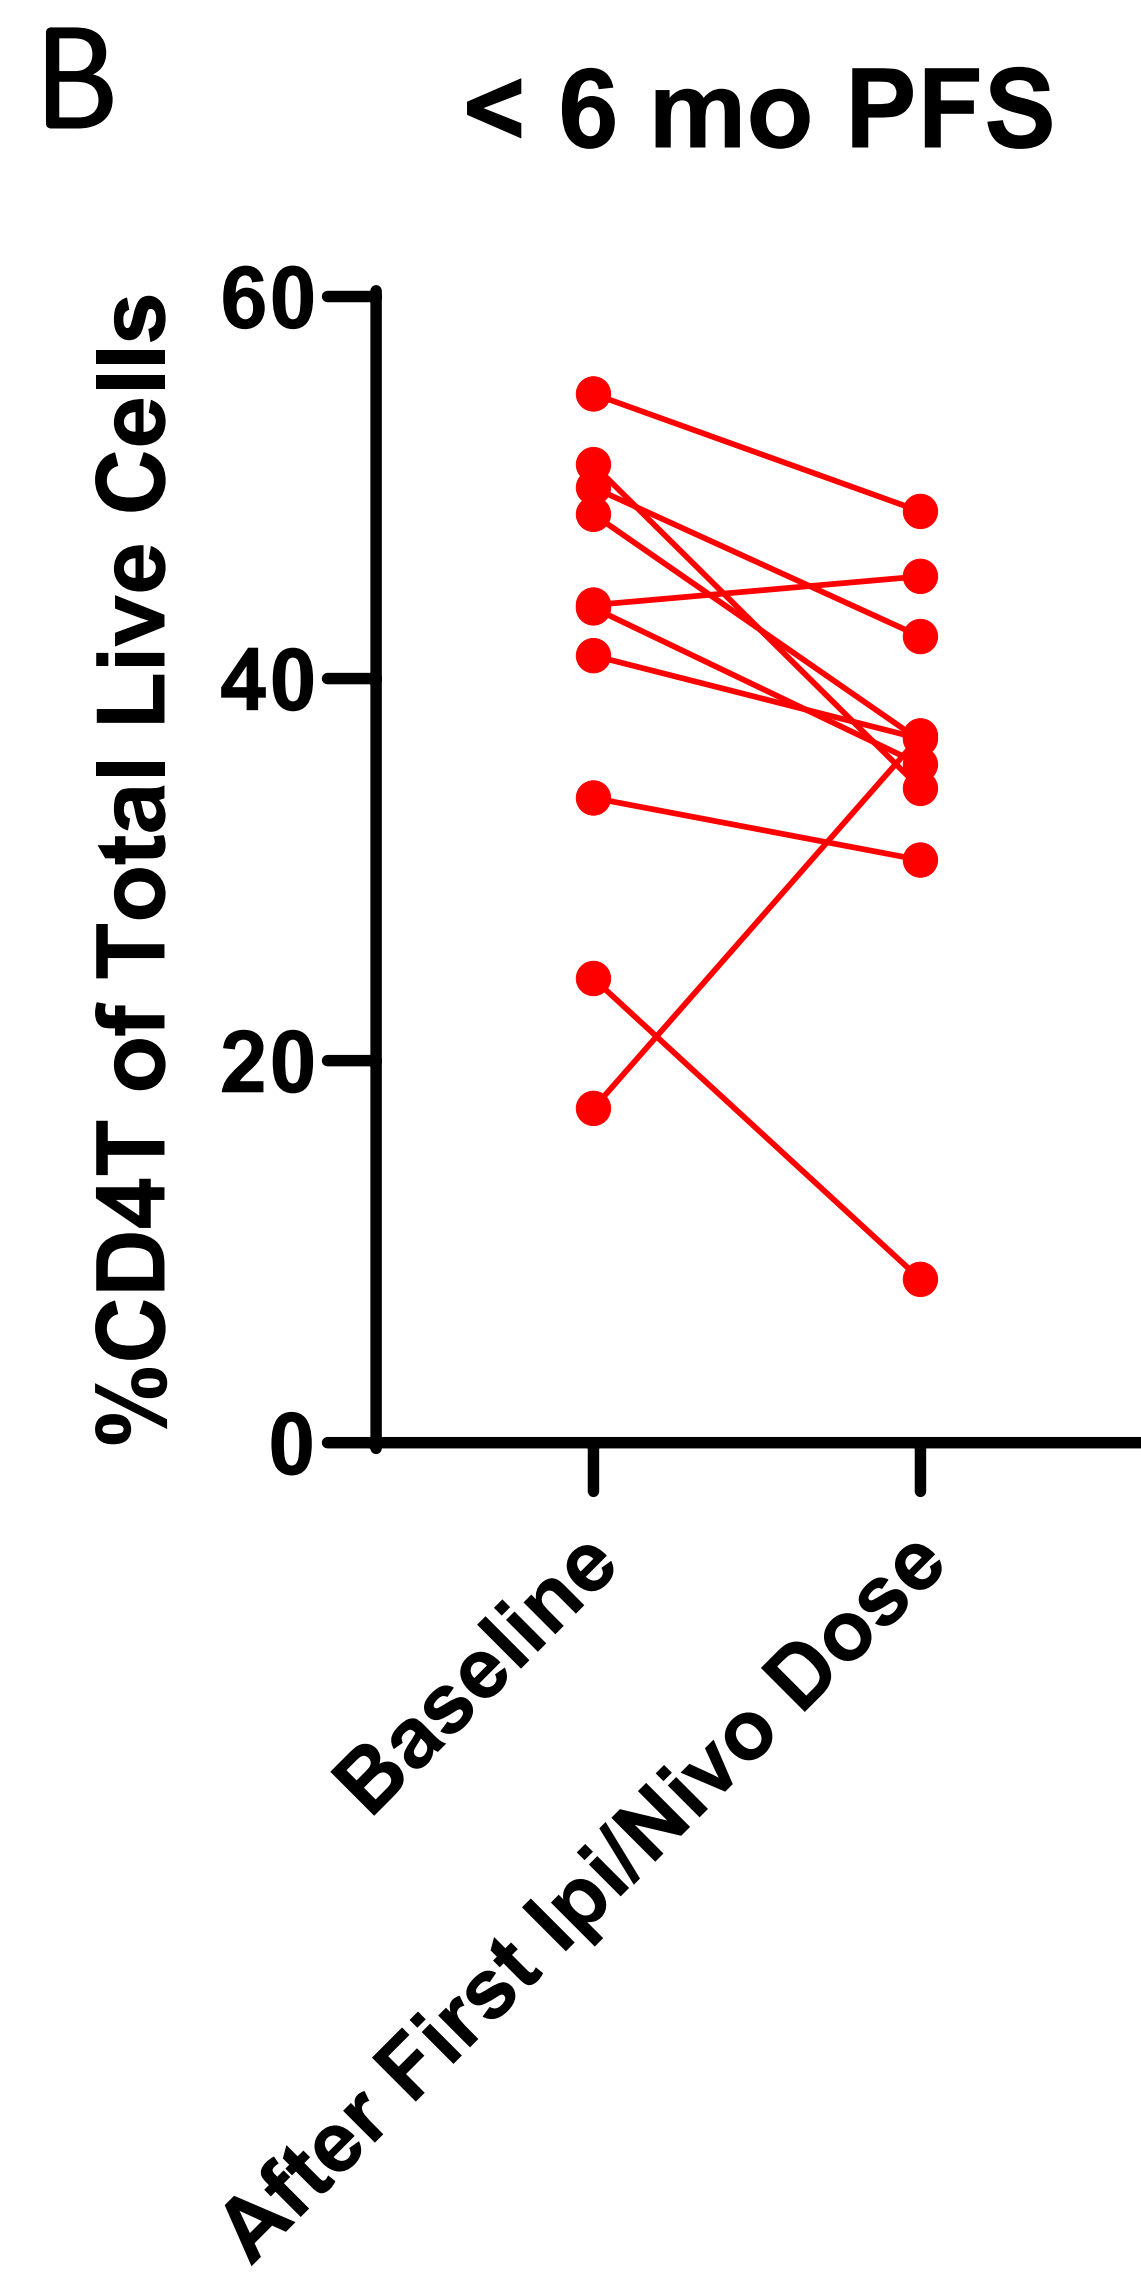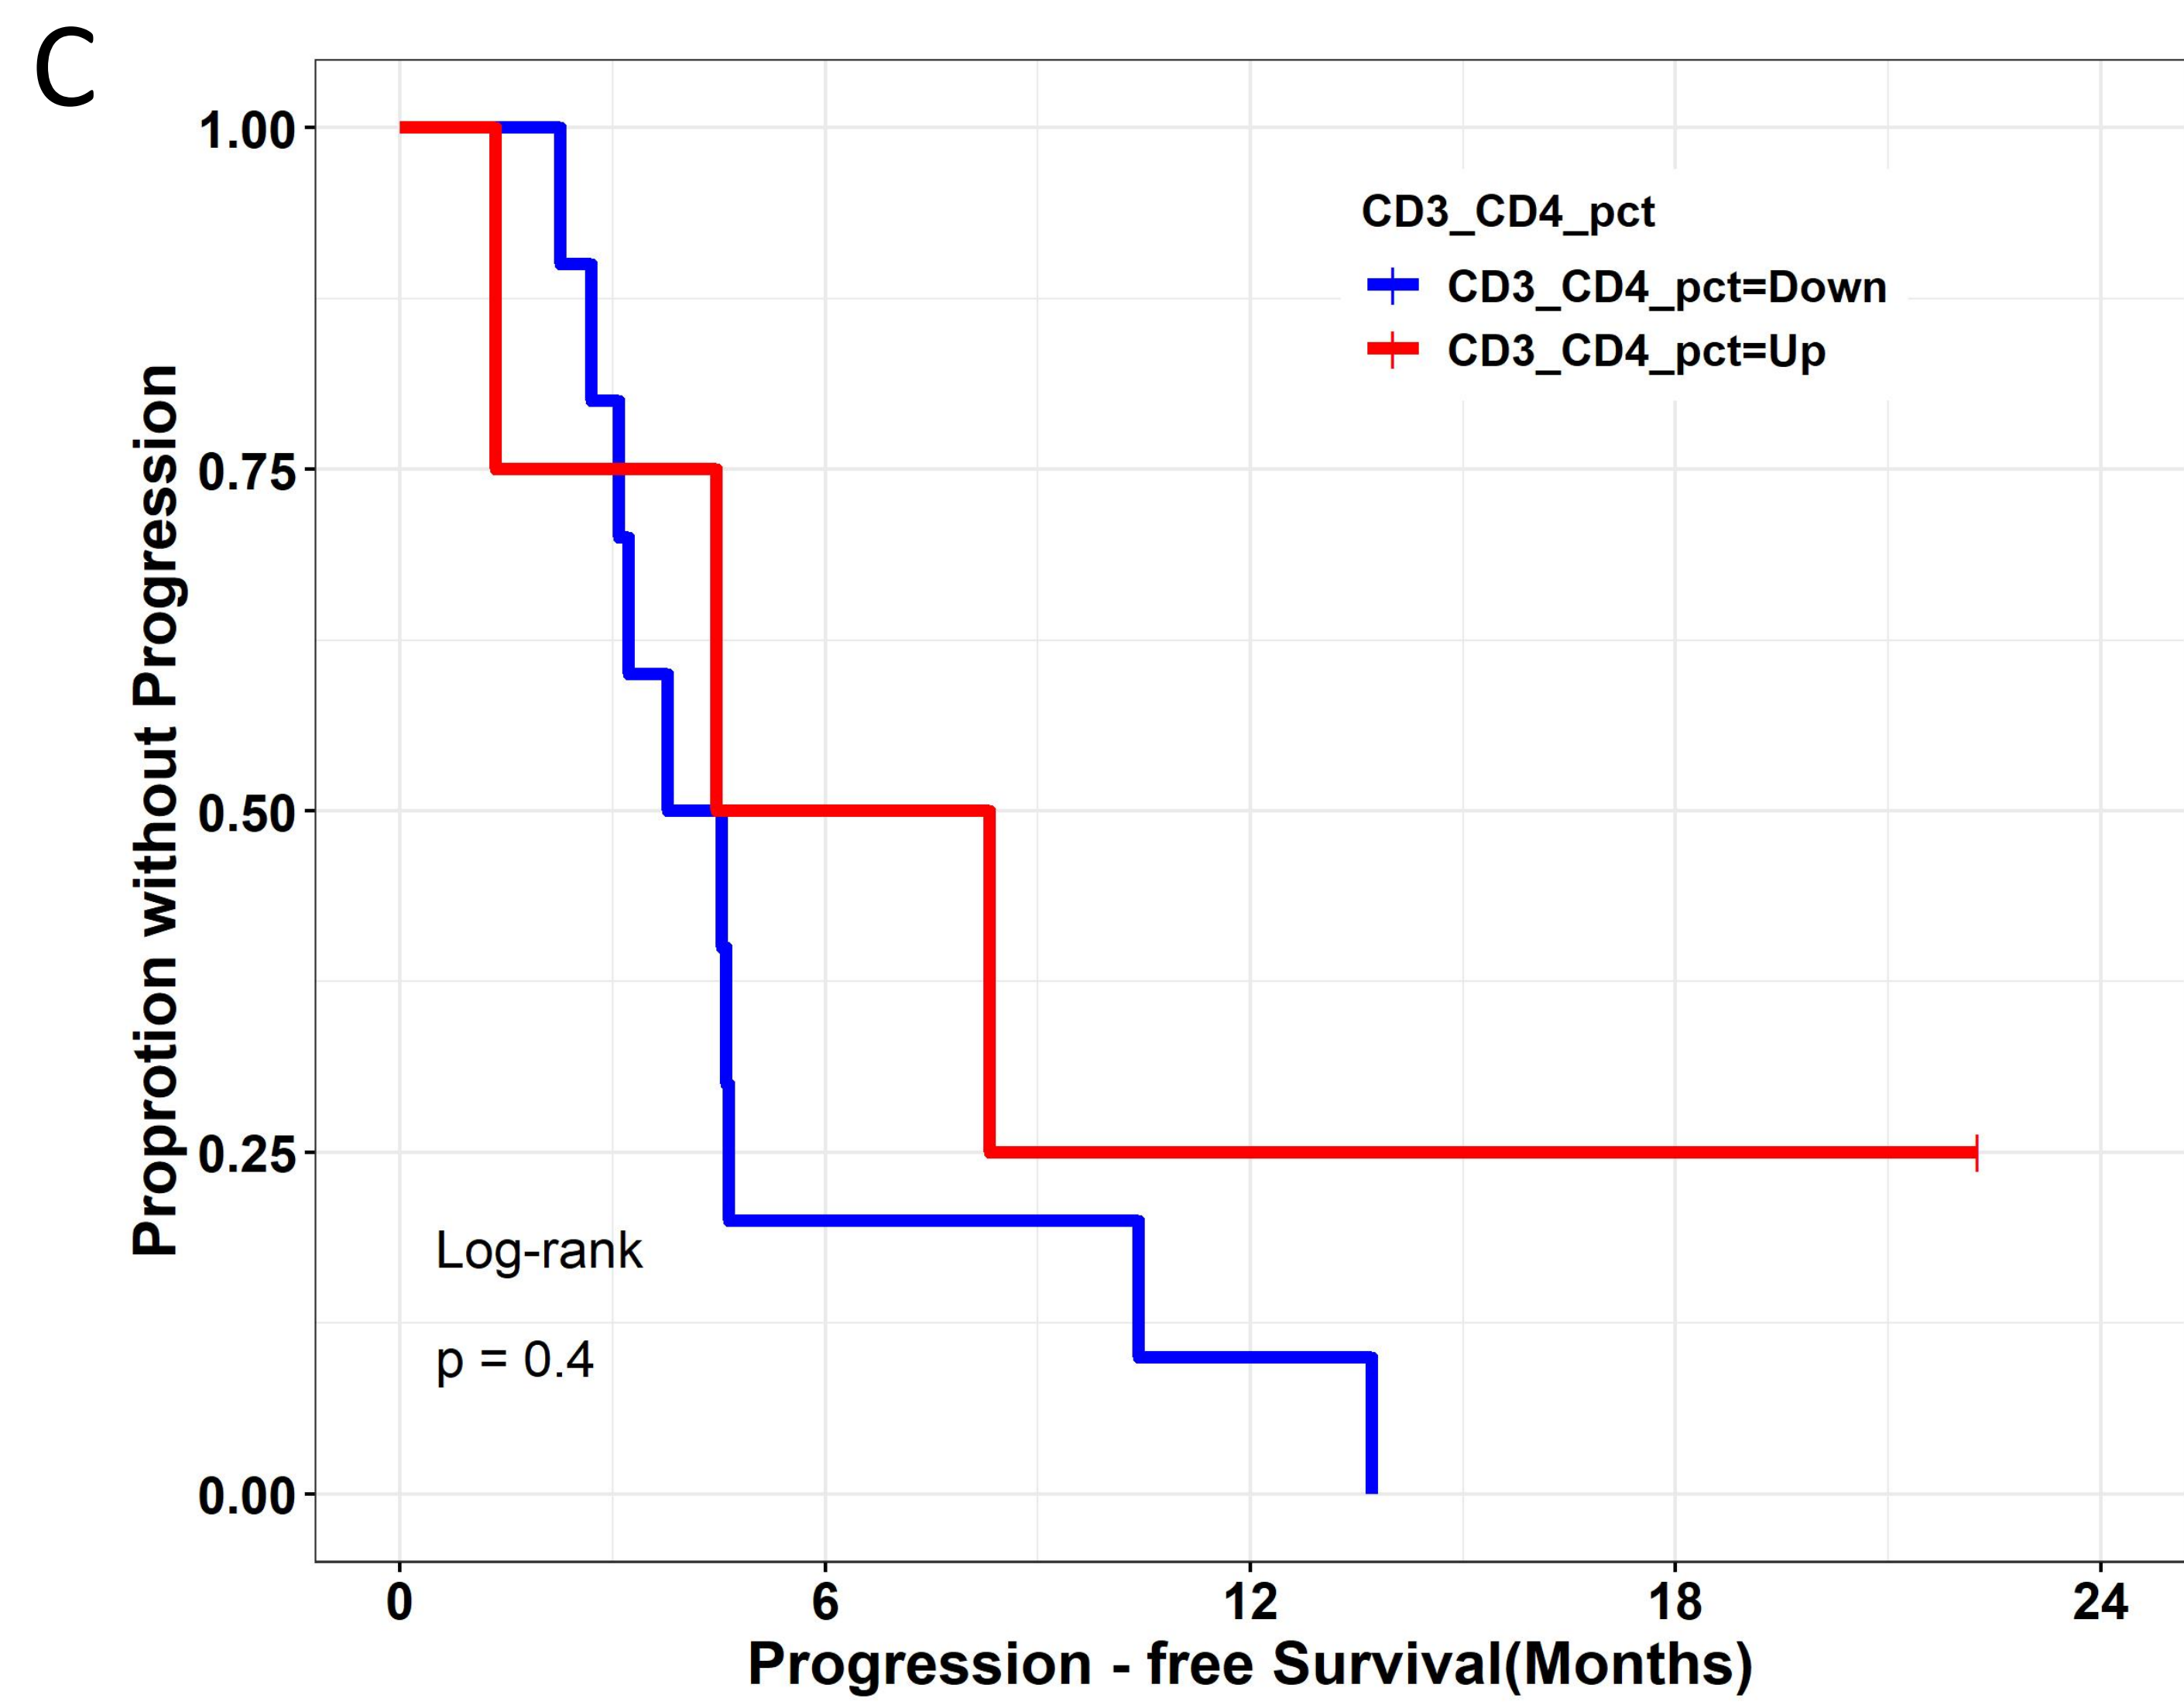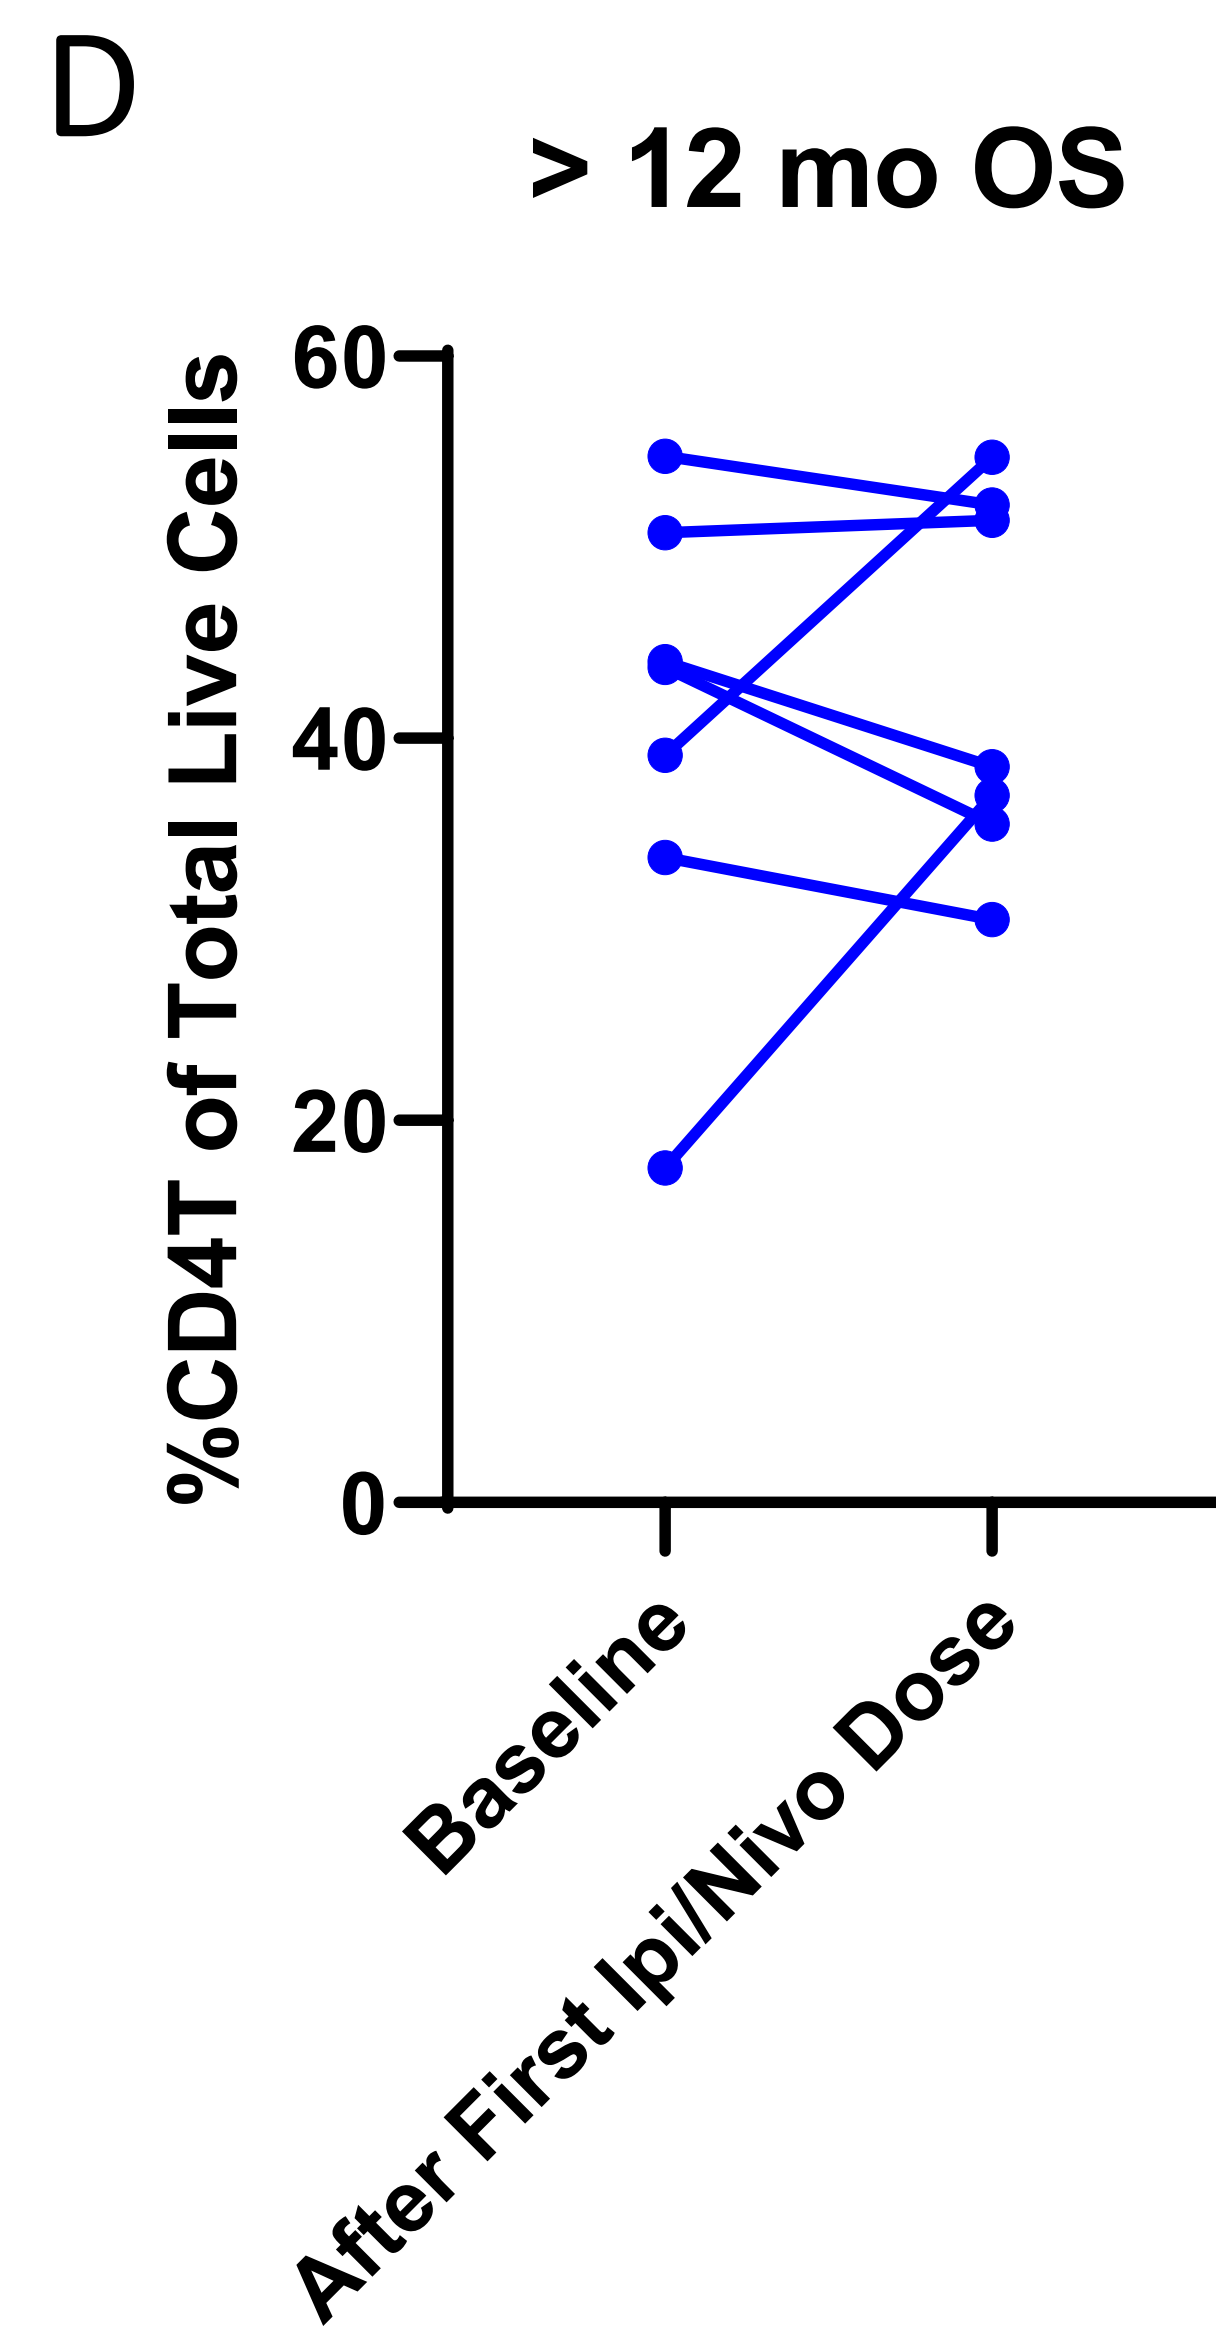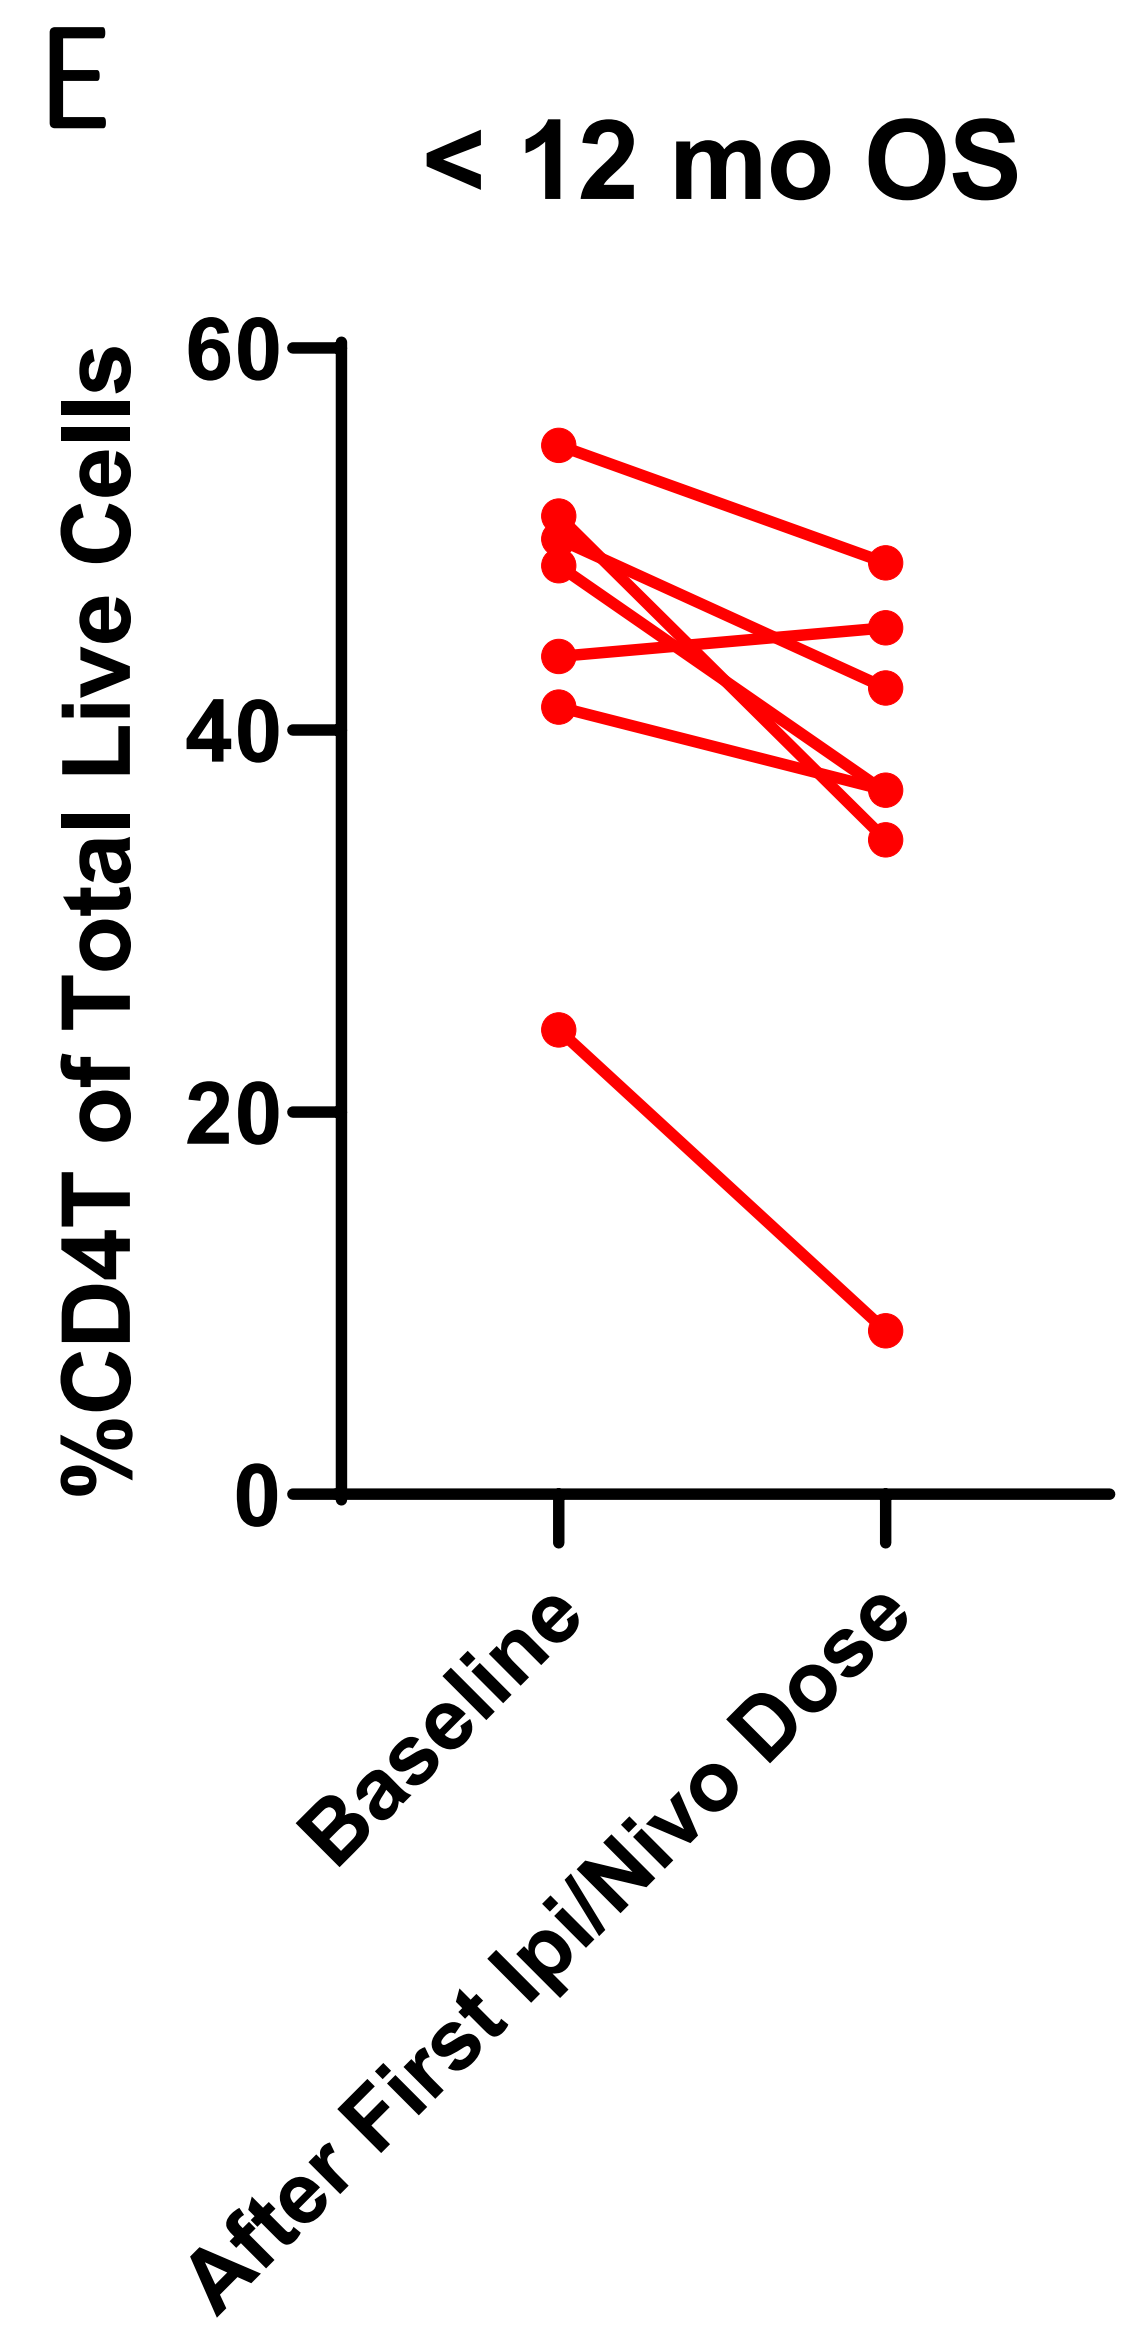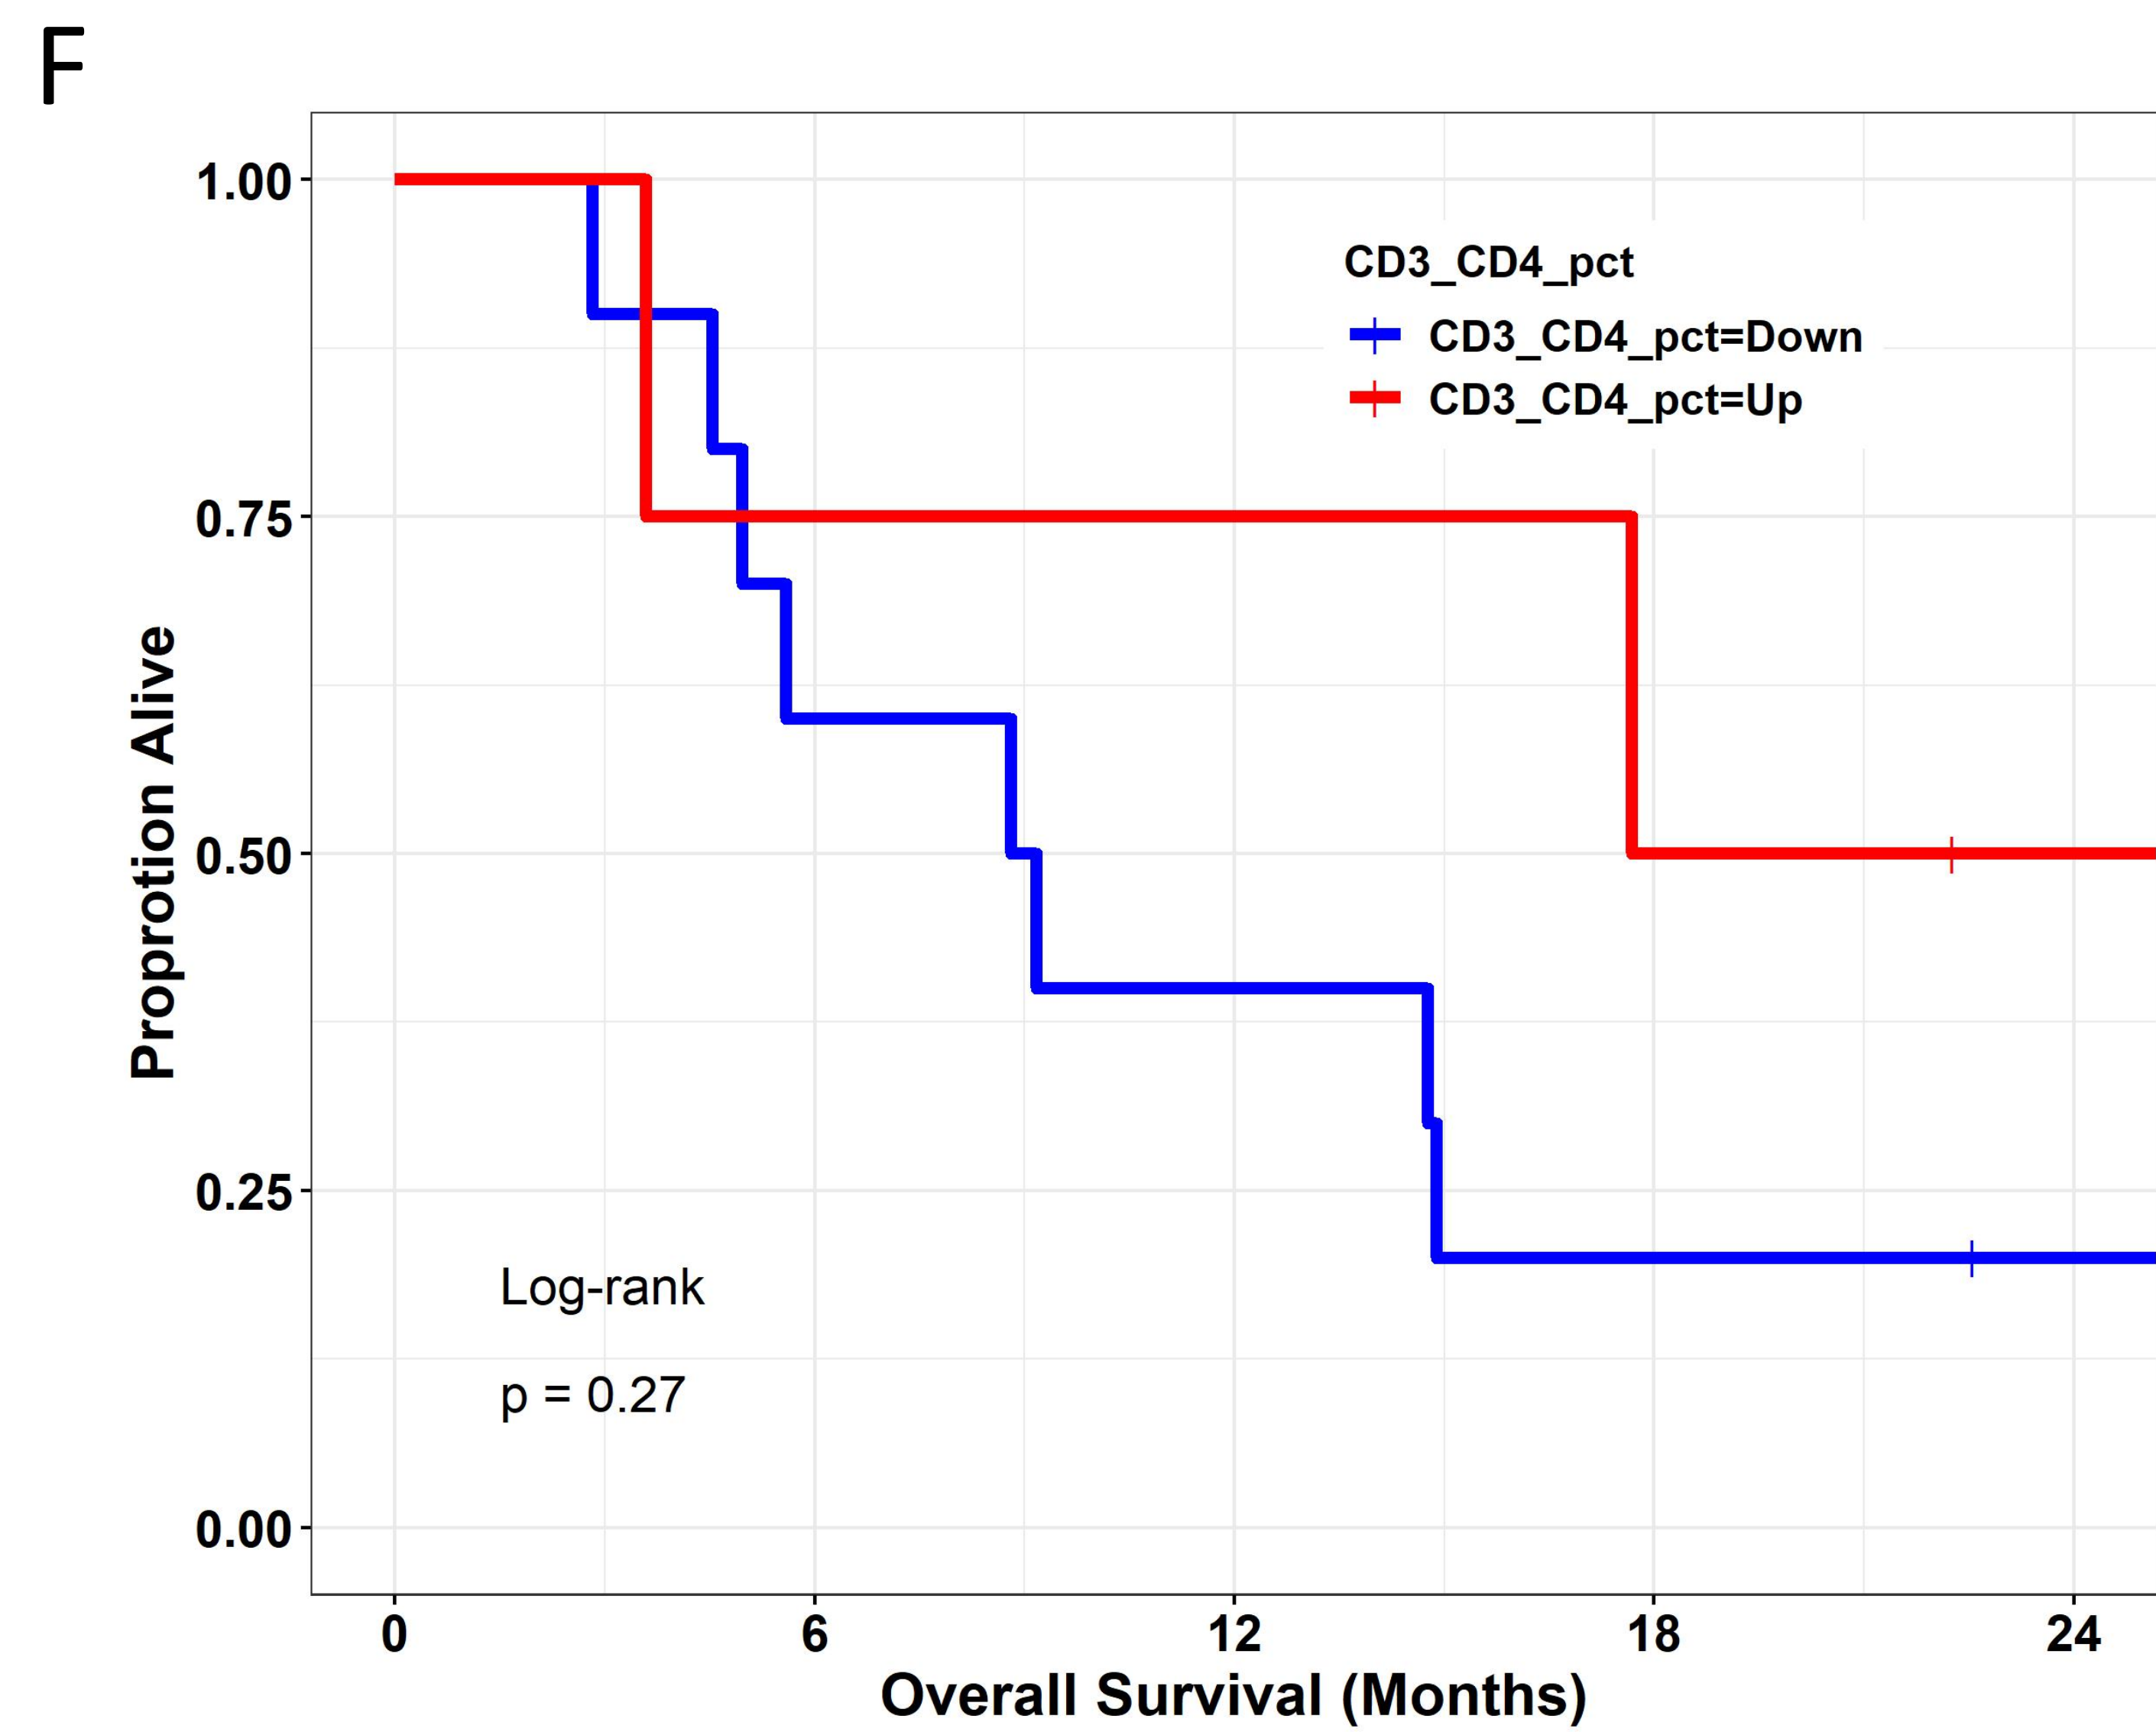

Supplement: NIHMS1633048-supplement-Figures_E1-E4.pdf [file NIHMS1633048-supplement-Figures_E1-E4.pdf]
